RESEARCH ARTICLE

# Health service access for ethnically underrepresented communities: A scoping review of complex interventions

Jessica Rose Pawson<sup>1\*</sup>, Simon Cannon<sup>2</sup>, Saira Nazeer<sup>2</sup>, Caroline Phillpott<sup>2</sup>, Tadala Kolawole<sup>2</sup>, Joanna Fletcher<sup>3</sup>, Alison Thomson<sup>4</sup>, Jamie Ross<sup>4</sup>, Katie Jane Sheehan<sup>1</sup>, Gillian Woolhead<sup>5</sup>

**1** Bone & Joint Health, Blizard Institute, Queen Mary University of London, **2** Therapies department, Barts Health NHS Trust, **3** Orthopaedic Research department, Barts Health NHS Trust, **4** Wolfson Institute of Population Health, Queen Mary University of London, **5** Department of Health Sciences, Brunel University

\* [j.pawson@qmul.ac.uk](mailto:j.pawson@qmul.ac.uk)

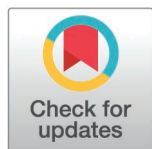

## Abstract

### Background

The aim of this scoping review is to systematically map the existing evidence of complex interventions used to improve access and/or engagement of ethnically underrepresented communities with healthcare services in the UK, and explore equity factors of the evidence.

### Methods

The review was guided by the Preferred Reporting Items for Systematic Reviews and Meta-Analyses Extension for Scoping Reviews Checklist. Six databases were searched. Analysis was completed using reflexive and thematic content analysis. Interventions were mapped against the five domains of the Patient-centred access framework and the PROGRESS-Plus equity framework.

### Results

A total of 35 studies met the inclusion criteria. Of these studies 63% were completed in primary care, 31% in mental health, 3% in maternity services and 3% in dental care. Several communities were represented, including Gypsy, Roma and Travellers, African Caribbeans, Jewish communities, as well as broader groups such as South Asians, migrants and Muslims. Complex interventions were spread across the five domains of the patient centred access framework and included strategies such as outreach workers, using community settings such as places of worship, cultural adaptations and cultural training for healthcare staff. Effectiveness of interventions was assessed in a third of studies. PROGRESS-Plus analysis identified exclusion criteria including age groups (e.g., below 18 years), ethnic groups (e.g., not first-generation

## OPEN ACCESS

**Citation:** Pawson JR, Cannon S, Nazeer S, Phillpott C, Kolawole T, Fletcher J, et al. (2026) Health service access for ethnically underrepresented communities: A scoping review of complex interventions. PLoS One 21(1): e0340079. <https://doi.org/10.1371/journal.pone.0340079>

**Editor:** Angela Mendes Freitas, University of Coimbra: Universidade de Coimbra, PORTUGAL

**Received:** January 28, 2025

**Accepted:** December 16, 2025

**Published:** January 6, 2026

**Copyright:** © 2026 Pawson et al. This is an open access article distributed under the terms of the [Creative Commons Attribution License](https://creativecommons.org/licenses/by/4.0/), which permits unrestricted use, distribution, and reproduction in any medium, provided the original author and source are credited.

**Data availability statement:** All relevant data are within the manuscript and its [Supporting Information](#) files. The authors confirm that all data is within the revised manuscript and [supporting information](#).

**Funding:** JRP is funded by the Wellcome Trust on a Doctoral Fellowship (Health Advances in Underrepresented Research - HARP). The funders had no role in study design, data collection and analysis, decision to publish, or preparation of the manuscript.

**Competing interests:** The authors have declared that no competing interests exist.

migrants), disabilities (e.g., severe mental health problems) and plus (e.g., language proficiency).

## Conclusions

All domains of the patient centred access framework were represented with approachability and acceptability being the most common. Effectiveness assessment was not included in two thirds of studies however, complex interventions show promise to improve equity in ethnically underrepresented communities. Future research should endeavour to assess effectiveness and the translation of interventions in healthcare contexts outside of primary care and mental health. Future policy and research should consider how to increase transparency of power and build strong collaborations with underrepresented communities.

## Introduction

In the United Kingdom (UK), the pursuit of equitable access and improved health outcomes remains a paramount goal [1,2]. Despite progress, significant disparities persist, particularly in ethnically underrepresented communities and low socioeconomic status groups, where life expectancy gaps reach 10.3 years in men and 8.3 years in women compared to high socioeconomic status White British counterparts [1,2]. Indeed, UK ethnically underrepresented communities experience higher rates of long-term conditions [2], poorer healthcare access [2–4], and poorer health outcomes [2,5].

Disparities in healthcare access among ethnically underrepresented communities arise for several reasons. For example, power, shame and cultural influences were found to influence health-seeking behaviours among ethnically underrepresented communities suffering from psychosis [6,7]. Studies in palliative and end-of life care in Gypsy, Traveller and Roma communities identified insensitivity in health services regarding community involvement in decisions and cultural death rituals fostering mistrust in healthcare systems [8,9]. A systematic review exploring bereavement across ethnically underrepresented communities also identified lack of staff cultural awareness across Bangladeshi, Black Caribbean and Gypsy and Traveller communities [10]. An Australian review exploring patient safety found people from ethnically underrepresented communities had higher rates of hospital acquired infections, adverse drug events, complications, and dosing errors when compared to the wider population [11]. It identified contributing factors to increased risk of safety events included language proficiency, beliefs about illness and treatment, formal and informal interpreter use, consumer engagement, and interactions with health professionals [11]. To address disparities in healthcare access, multifaceted solutions often characterised as complex interventions are required [1].

A scoping review of non-UK healthcare studies identified inclusion strategies such as culturally and/or linguistically matched staff, identifying uninsured individuals, communication strategies such as specific phone numbers and

streamlining services by creating single points of contact [12]. Studies outside of the UK provide critical background with shared barriers to healthcare such as language proficiency, health literacy, valuing traditional medicine and modesty existing across different groups [13]. However, ultimately the healthcare system context shapes access and delivery of care and this varies between public systems such as the UK and private and insurance-based health services.

## Aim

The aim of this review is to synthesise the evidence for complex interventions to support access and/or engagement of ethnically underrepresented communities in UK health services. The synthesis will align to Levesque et al.'s patient-centred access framework which encapsulates five service domains: approachability, acceptability, availability, affordability, and appropriateness [14]. Data extraction and analysis will also include equity factors guided by the PROGRESS-PLUS framework [15]. The findings will enable 1) the identification of gaps for future research and 2) preliminary guidance for policymakers, clinicians and public health bodies on how best to support healthcare service access and engagement of ethnically underrepresented communities.

## Methods

This review is reported according to the Preferred Reporting for Systematic Reviews and Meta-Analysis extension for Scoping Reviews (PRISMA-Scr) checklist [16].

## Eligibility criteria

Studies of interventions to improve ethnically underrepresented communities access to and/or engagement with adult UK healthcare services were included. These included interventions targeted at both patients and healthcare professionals (e.g., cultural competency training). The UK Medical Research Council (MRC) define complex interventions as having several interacting components and/or the properties itself being complex [17]. The MRC also describe how complex interventions may require flexibility or permit tailoring, be dependent on the behaviours of those delivering and receiving the intervention and involving multiple systems (e.g., individual, organisational, societal) [17]. This definition has been applied to the studies within this review. Ethnically underrepresented communities were defined as all ethnic groups except White British [18]. Studies focused on testing existing healthcare interventions on ethnically underrepresented communities but not aiming to improve access and/or engagement in health services were excluded. Studies exploring underrepresented groups where ethnically underrepresented communities were not > 50% of the participants were also excluded.

## Searches

CINAHL Ultimate, Medline, Psychology and Behavioral Sciences Collection, APA Psych Info, Cochrane Library and Pedro were searched on 8<sup>th</sup> April 2024. The search strategy and keywords were developed using the Population (ethnically underrepresented communities), Concept (access/engagement), Context (National Health Service [NHS]/UK health services) framework (S1 Appendix) [19]. Searches were limited to English language and by publication date (01/01/2014–08/04/2024). The search was limited to studies published from 2014 onwards to ensure relevance to the current NHS context, as earlier studies may not reflect current policy, service delivery changes or population needs; this timeframe also limited the number of results which aligned with the available resources for this project.

The initial searches were completed on CINAHL and Medline exploring combinations of search terms to identify the most effective terminology before being completed on the remaining databases. Reference and citation lists of included articles were also searched.

## Selection

All search results were exported to the Rayyan database for de-duplication, screening, and selection against eligibility criteria by two independent researchers (JRP, SC, SN, CP, TK) [20]. Conflicts were resolved by consensus.

## Data charting items and process

Data from the included articles was extracted to a standardised Excel data chart by an individual researcher (JRP) and 10% of the data was independently charted by another researcher for comparison (SN) [21]. Extracted data included study title, author, year of publication, study design, location, population, healthcare setting and intervention (S2 Appendix). The intervention components were mapped to the Patient Centred Access Framework [14]. Eligibility criteria, baseline characteristics and subgroup analyses were mapped to the Cochrane and Campbell Collaboration Equity methods group's PROGRESS-Plus framework [15,22]. **PROGRESS** is an acronym for **P**lace of residence, **R**ace/ethnicity/language/culture, **O**ccupation, **G**ender, **R**eligion, **E**ducation, **S**ocioeconomic status and **S**ocial Capital [15,22]. **PLUS** enables the framework to capture other factors which impact equity, such as 1) age 2) disability 3) features of relationships and 4) time-dependent relationships [15,22]. Using the PROGRESS-Plus framework in the inclusion/exclusion analysis provided a structured and transparent way to map equity characteristics of each study, allowing a better understanding of the diversity of the populations represented under the broad term "ethnically underrepresented communities". This approach helped identify which specific dimensions of disadvantage (e.g., language, socioeconomic position, language) were considered across the studies, highlighting variation and gaps in how equity has been defined and operationalised.

## Synthesis of results

Numerical content analysis was used to summarise study designs, locations, populations and healthcare settings. The remaining data analysis was guided by Braun and Clarke's [23] Thematic Content Analysis and reflexive thematic analysis [24]. Analysis involved deductively categorising components of interventions to Levesque et al's patient-centred access framework domains [14]. The software Trello was used to extract and code the themes of each domain into categories (combining similar themes or those with overlaps). Trello was utilised to support organisation, visualisation and coding of themes, whilst it is typically an organisational tool, it has also been used in other qualitative studies to support reflexive thematic analysis [25]. The included papers were re-read to inductively assess for any additional themes not encompassed in the patient-centred access framework. After the information on Trello was finalised, a Word document of themes and categories was then developed and reviewed (by JRP and GW) (S4 Appendix).

## Results

The search on CINAHL Ultimate retrieved 757 results, Medline retrieved 757, Psychology and Behavioural Sciences Collection retrieved 105, APA Psych Info retrieved 46, Cochrane Library retrieved 363 and Pedro (The Physiotherapy Evidence Database) retrieved 74. This identified a total of 2,102 results from databases. Duplicates were removed in Rayyan, resulting in a total of 1,299 articles. Reference lists of included articles were also searched resulting in 465 more articles being assessed for eligibility and citations sourced another 28 articles. After screening against the eligibility criteria, 35 studies were included in this scoping review, 14 from databases and 21 from other sources (reference and citation tracking) (Fig 1).

Included articles were published between 2014 and 2024. Interventions included (but not limited to) outreach workers employed to target ethnically underrepresented communities for health checks [27–29], a family based culturally adapted intervention for schizophrenia [30,31] and physical activity and lifestyle interventions [32,33]. Table 1 includes a full summary of study and intervention characteristics.

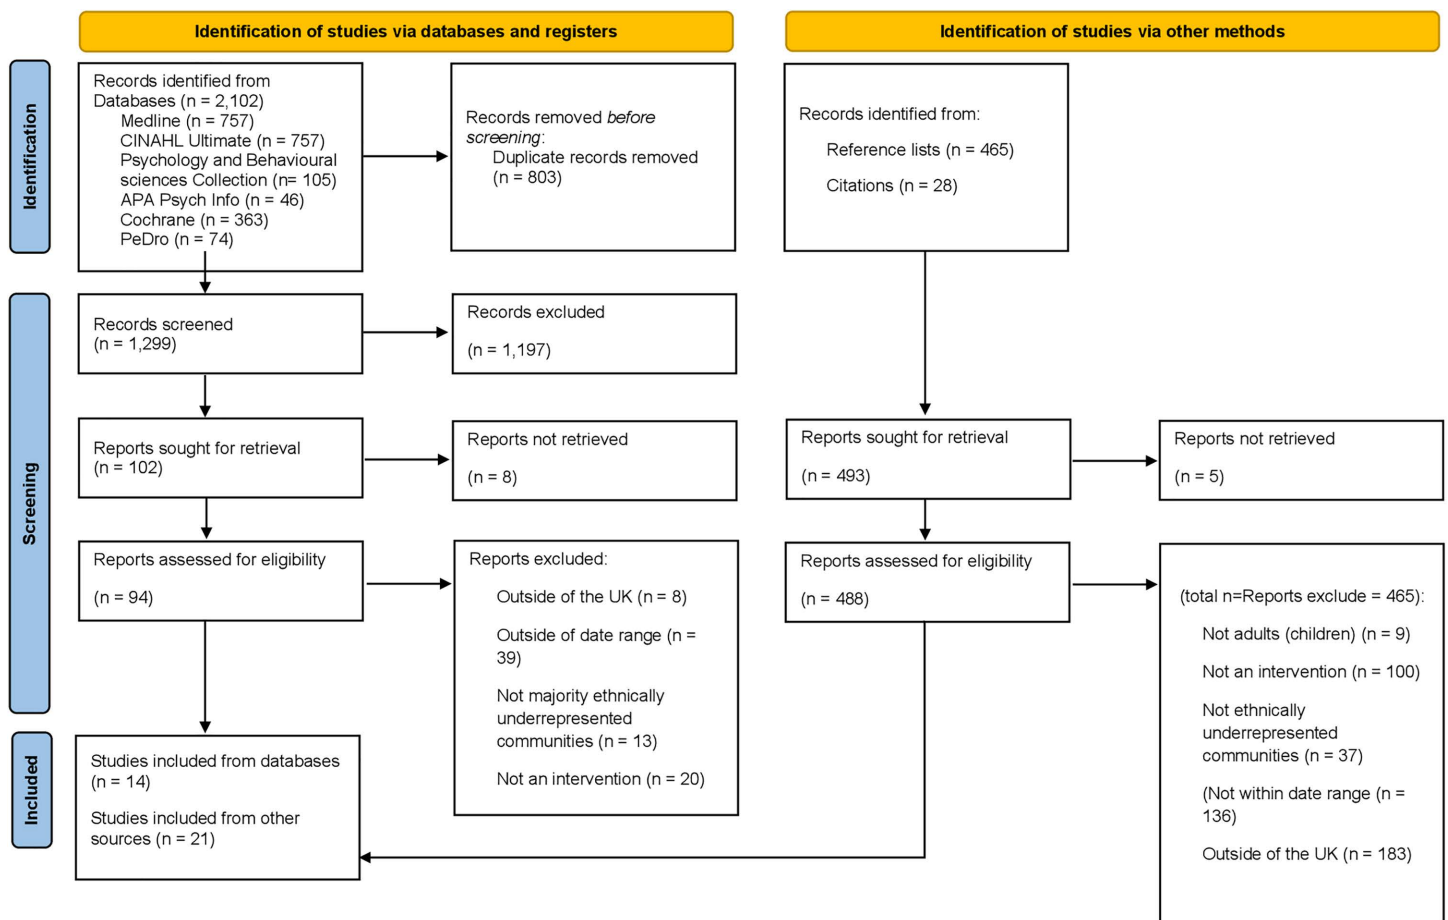

Fig 1. PRISMA diagram [26].

<https://doi.org/10.1371/journal.pone.0340079.g001>

## Participants

A total number of 2,761 participants plus 102 stakeholders/service providers were included in the 35 studies. Sample size ranged from three [55] to 800 participants [28]. Four studies did not report the number of participants, two due to the use of aggregate health data [46,48] and two reported on programmes that did not collect numbers of participants they engaged with [29,32]. Studies included different populations including those identifying as Gypsy, Roma and Traveller groups, South Asians, Pakistanis, Chinese migrants, Jewish communities, migrant mothers broadly, self-identifying Muslims, Bangladeshis, Black British people, Black Caribbean or African communities, and Black, Asian and ethnically under-represented communities more broadly.

## Health services and location

The studies covered various health service areas, with 22 (63%) primary care, 11 (31%) mental health, 1 (3%) dental health and 1 (3%) maternity care.

Geographically, 40% of the studies were in London, 16% in Manchester, 13% were UK wide (or multiple sites across the UK), and the rest distributed between Bradford, Bristol, Coventry, Northern Ireland, Leeds, Middlesborough, North of England, Salford, Scotland and South East England.

**Table 1. Summary of included studies.**

| Citation         | Study design                                                                                                      | Study aim                                                                                                                                                                                                                                                                                         | Health service                  | Population                                                                    | Area of the UK                             | Intervention                                                                                                                                                                                                                                                                                                                                                                                                                             |
|------------------|-------------------------------------------------------------------------------------------------------------------|---------------------------------------------------------------------------------------------------------------------------------------------------------------------------------------------------------------------------------------------------------------------------------------------------|---------------------------------|-------------------------------------------------------------------------------|--------------------------------------------|------------------------------------------------------------------------------------------------------------------------------------------------------------------------------------------------------------------------------------------------------------------------------------------------------------------------------------------------------------------------------------------------------------------------------------------|
| Dyson, 2020 [34] | Mixed Methods: Intervention Mapping, prioritisation, cross community synthesis of interventions                   | The study aims were to a) Investigate facilitators and barriers to acceptability and uptake of immunisations amongst six Gypsy, Roma and Traveller communities across four UK cities and b) to identify potential interventions aimed at increasing uptake of immunisations in these communities. | Primary care (immunisation)     | 51 Gypsy, Roma and Travellers and 21 service providers                        | Bristol, York, Glasgow and London          | This priority setting exercise of potential interventions included: healthcare professional cultural competence training, ways to identify Gypsy, Roma and Travellers in Health records to monitor uptake and tailor support, allocating a named frontline person in GP Practice, having flexible and diverse appointment booking, recall and reminder systems, and protected funding for specialist health visitor (community outreach) |
| Edge, 2016 [30]  | Protocol for a mixed methods feasibility cohort design study                                                      | This protocol outlines the study plans which are to test the feasibility and acceptability of delivering Culturally-adapted Family Intervention (CaFI) to African-Caribbean service users diagnosed with schizophrenia.                                                                           | Community Mental Health         | African-Caribbeans diagnosed with schizophrenia and their families (protocol) | Manchester                                 | CaFI is a culturally adapted version of a structured, cognitive-behavioural model of Family Intervention comprising psycho-education, cognitive behavioural skills for stress management, coping and problem solving. Key aspects of the culturally adapted version include focusing on recovery and adopting a shared learning approach where therapists play to family strengths.                                                      |
| Edge 2018 [31]   | Mixed methods study including intervention development, evidence synthesis, feasibility and acceptability testing | This study aims to test the feasibility and acceptability of delivering Culturally-adapted Family Intervention (CaFI) to African-Caribbean service users diagnosed with schizophrenia.                                                                                                            | Community Mental Health         | 31 African-Caribbeans diagnosed with schizophrenia and their families         | Manchester                                 | Same as intervention above                                                                                                                                                                                                                                                                                                                                                                                                               |
| Goff, 2021 [33]  | Mixed methods randomised controlled feasibility trial                                                             | Study aimed to evaluate the acceptability, fidelity and trial feasibility of the culturally tailored type two diabetes self-management education and support program in Black British adults – the Healthy Eating and Active Lifestyles for Diabetes ('HEAL-D')                                   | Primary care (Diabetes)         | 63 Black British Adults                                                       | London (boroughs of Lambeth and Southwark) | Intervention. The Healthy Eating and Active Lifestyles for Diabetes ("HEAL-D") intervention developed as per Moore et al. (2019).                                                                                                                                                                                                                                                                                                        |
| Penn, 2014 [35]  | Qualitative study using the Theoretical Domains Framework                                                         | To investigate Pakistani female participants' perspectives of their behaviour change and of salient intervention features                                                                                                                                                                         | Primary care                    | 20 Pakistani females                                                          | Middlesborough                             | New Life, New You. Culturally adapted behavioural change programme aimed to improve Physical Activity levels in ethnic minorities. A community based 8 weeks programme of group based advice.                                                                                                                                                                                                                                            |
| Latif, 2016 [36] | Pilot study (Pre-test, post-test)                                                                                 | To assess the effectiveness of a health promotion video delivered in Bengali (native language to the local community population) in a community setting for coronary artery disease.                                                                                                              | Primary care (health promotion) | 18 Bangladeshi (eighteen females)                                             | South London                               | An educational video was developed using the British heart foundation guidance and Bengali cultural and language adaptations, on the signs, symptoms and prevention of coronary artery disease. The video was played in Bengali to a Bangladeshi women's group.                                                                                                                                                                          |
| Such, 2019 [32]  | Analysis of secondary dataset                                                                                     | Analysis of a physical activity data set of programmes focussed on minority ethnic populations.                                                                                                                                                                                                   | Primary care (health promotion) | 57 programmes focusing on minority groups broadly                             | UK wide dataset                            | Three case studies used in the paper to demonstrate features of the physical activity interventions included in the dataset. Interventions included for example: community venues, multilingual facilitators, factoring in cultural beliefs and values to support programme design and delivery.                                                                                                                                         |

(Continued)

Table 1. (Continued)

| Citation         | Study design                                                                                          | Study aim                                                                                                                                                                                                                                                                                                                                      | Health service          | Population                                                         | Area of the UK                 | Intervention                                                                                                                                                                                                                                                                                                                                                                                                                                                                                                                                                                                                                                      |
|------------------|-------------------------------------------------------------------------------------------------------|------------------------------------------------------------------------------------------------------------------------------------------------------------------------------------------------------------------------------------------------------------------------------------------------------------------------------------------------|-------------------------|--------------------------------------------------------------------|--------------------------------|---------------------------------------------------------------------------------------------------------------------------------------------------------------------------------------------------------------------------------------------------------------------------------------------------------------------------------------------------------------------------------------------------------------------------------------------------------------------------------------------------------------------------------------------------------------------------------------------------------------------------------------------------|
| Yuan, 2019 [37]  | Quasi-experimental study without randomization                                                        | The study aimed to evaluate a culturally appropriate community-based oral health education intervention.                                                                                                                                                                                                                                       | Dental Health           | 17 Chinese “newly arrived” undocumented migrant mothers of infants | Northern Ireland               | Culturally tailored community education through telephone and home visits and unlimited social support. Oral health intervention was delivered over 12 months and focused on oral health related knowledge, attitudes and behaviours, including knowledge of tooth brushing, sugar consumption and other oral related behaviours.                                                                                                                                                                                                                                                                                                                 |
| Khan, 2019 [38]  | Mixed methods feasibility study: qualitative and pre-test, post-test feasibility and acceptability    | This study aims to assess the acceptability and feasibility of a cognitive behavioural therapy-based intervention called the Positive Health Program (PHP) in British Pakistani women. The study also assessed experiences of depression and the intervention.                                                                                 | Maternal Mental Health  | 36 British Pakistani Women                                         | Manchester                     | Positive Health Programme (PHP) – Culturally adapted psychological group based 12 week intervention. Elements include: delivery focused on maternal well being and not just postnatal depression, community based programme and identification and inclusion of the specific pressures and expectations of being a British Pakistani woman.                                                                                                                                                                                                                                                                                                       |
| Stone, 2019 [27] | Qualitative interview study of 15 members of staff                                                    | To understand staff perspectives of a novel telephone outreach intervention that aims to improve the uptake of NHS Health Checks in Black, Asian and Ethnic Minority communities where the risk of cardiovascular disease is higher.                                                                                                           | Primary care            | Black, Asian and Ethnic minority groups                            | Bristol                        | Novel telephone outreach using Telephone Outreach Workers that contact patients from minority ethnic groups to inform them they are eligible for a health check and support booking them an appointment.                                                                                                                                                                                                                                                                                                                                                                                                                                          |
| Filby, 2020 [39] | Service evaluation                                                                                    | To evaluate a specialist migrant maternity service                                                                                                                                                                                                                                                                                             | Maternal care           | 10 Migrant mothers of different nationalities                      | Kings College Hospital, London | Antenatal maternity care provided within the initial accommodation centre and supported transport to hospital appointments, supported women regarding healthcare subsidies and charges, worked collaboratively with other relevant services (such as GPs, health visitors, Refugee Council). Founded the multilingual baby group the South London Happy Baby Group Community.                                                                                                                                                                                                                                                                     |
| Mir, 2015 [40]   | Mixed Methods: Qualitative interviews and feasibility and acceptability of the developed intervention | To develop cultural adaptations of the existing behavioural activation manual and to assess the feasibility and acceptability. It is anticipated that this adaptation may help facilitate effective relationships between Muslim patients and therapists to support therapists to respectfully engage patients about their religious identity. | Community mental health | 19 self-identifying Muslims                                        | Bradford, UK                   | Culturally adapted Behavioural Activation (BA) for depression. BA was adapted to add the discussion of environmental stressors in relation to depression and this link to religion, patients were offered a choice of culturally matched therapists or not (due to mixed findings), therapists were educated about Islam, and the adaptation promoted professionalism and a non-judgemental approach to these conversations). Therapists assessed how important religion was to patients and used this to guide the BA focus. A self help guide was also developed Between 6 and 12 sessions were offered and family were offered to be involved. |

(Continued)

Table 1. (Continued)

| Citation          | Study design                                                                                                                                                        | Study aim                                                                                                                                                                                                                                                                                            | Health service                       | Population                                                                                                                        | Area of the UK                                    | Intervention                                                                                                                                                                                                                                                                                                                                                                                                                                                                                                                                                                         |
|-------------------|---------------------------------------------------------------------------------------------------------------------------------------------------------------------|------------------------------------------------------------------------------------------------------------------------------------------------------------------------------------------------------------------------------------------------------------------------------------------------------|--------------------------------------|-----------------------------------------------------------------------------------------------------------------------------------|---------------------------------------------------|--------------------------------------------------------------------------------------------------------------------------------------------------------------------------------------------------------------------------------------------------------------------------------------------------------------------------------------------------------------------------------------------------------------------------------------------------------------------------------------------------------------------------------------------------------------------------------------|
| Moore, 2019 [41]  | Intervention development using focus groups with patients                                                                                                           | The aim of this study was to develop a culturally sensitive intervention for type two diabetes mellitus for people of African Caribbean ethnicity, using the Behaviour Change Wheel and associated COM-B methodological framework to identify relevant behaviour change techniques.                  | Primary care (Diabetes)              | 41 Adults of self-declared Black African (BA) or Caribbean (BC) ethnicity with a clinical diagnosis of type two diabetes mellitus | South London, UK                                  | The Healthy Eating and Active Lifestyles for Diabetes (“HEAL-D”) intervention involved: information about health consequences and benefits of target behaviours including self-management, social support and social comparison (sharing success and failures), demonstration, training and instruction on how to perform behaviours, graded exercise tasks, credible sources and social comparison (development of videos featuring patients and professionals), goal setting and feedback on outcomes of behaviour and action planning. Intervention tested by Goff et al. (2021). |
| Masood, 2015 [42] | Nested qualitative study, part of an exploratory randomised controlled trial (RCT) conducted to test the feasibility and acceptability (study by Khan et al., 2019) | The aim of this study was to assess the acceptability and overall experience of the Positive Health Programme by British South Asian mothers.                                                                                                                                                        | Community mental health (postnatal)  | 83 British South Asian women with postnatal depression                                                                            | Lancashire and Manchester                         | Positive Health Programme (PHP) – Culturally adapted psychological group based 12 week intervention. Elements include: delivery focused on maternal well being and not just postnatal depression, community based programme and identification and inclusion of the specific pressures and expectations of being a British Pakistani woman.                                                                                                                                                                                                                                          |
| Husain, 2023 [43] | Two-arm single-blind exploratory randomised controlled trial                                                                                                        | To test the feasibility, acceptability and the efficacy of ROSHNI-D, a culturally sensitive group CBT intervention, the Positive Health Programme (PHP) in British South Asian women with Postnatal depression and compared it to a routine treatment group                                          | Maternal mental health               | 83 British South Asians Adults with maternal depression                                                                           | Lancashire and Manchester                         | Positive Health Programme (PHP) – Culturally adapted psychological group based 12 week intervention. Elements include: delivery focused on maternal well being and not just postnatal depression, community based programme and identification and inclusion of the specific pressures and expectations of being a British Pakistani woman.                                                                                                                                                                                                                                          |
| Buffin, 2015 [28] | Mixed methods – survey and qualitative interviews                                                                                                                   | To describe a peer outreach initiative used to increase organ donation in ethnic minorities                                                                                                                                                                                                          | Primary care (organ donation/kidney) | 800 participants – 70% Asian, 19.7% Black African/African Caribbean                                                               | London                                            | Peer outreach program at community events aimed to increase organ donors. Examples of the type of events attended by the Peer Educators include an Asian bridal show, a public library and a yoga class for South Asian elders.                                                                                                                                                                                                                                                                                                                                                      |
| Kelly, 2020 [44]  | Prospective feasibility study                                                                                                                                       | (1) The feasibility of recruiting South Asian migrants to view an educational film on Chronic Viral Hepatitis (CVH), (2) the effectiveness of the film in promoting testing and increasing knowledge of CVH, and (3) the methodological issues relevant to scale-up to a randomized controlled trial | Primary care (infectious diseases)   | 219 participants recruited of South Asian heritage                                                                                | South East England                                | Educational film with information about testing for Hepatitis was developed using focus groups and inclusion of personal stories of positive and negative effects of testing. Video is here: <a href="https://youtu.be/K3AYyZ3uHro">https://youtu.be/K3AYyZ3uHro</a>                                                                                                                                                                                                                                                                                                                 |
| Jain, 2014 [29]   | Descriptive article                                                                                                                                                 | To describe the work of Kidney Research UK Charity in relation to patient and public engagement, describing the Peer Educator model and providing examples including the “end-of-life project”, the deployment and impact of Peer Educators                                                          | Primary care (kidney research)       | The end-of-life project reached ~2,700 beneficiaries across 4 sites                                                               | UK broadly (Bedfordshire and 4 other renal units) | Peer educators completing patient engagement and outreach activities                                                                                                                                                                                                                                                                                                                                                                                                                                                                                                                 |

(Continued)

Table 1. (Continued)

| Citation             | Study design                                                                         | Study aim                                                                                                                                                                                                                                                                                                                                                                                           | Health service             | Population                                                                                                                        | Area of the UK                              | Intervention                                                                                                                                                                                                                                                                                                                                                                                                                                                                                                                                                                                                                              |
|----------------------|--------------------------------------------------------------------------------------|-----------------------------------------------------------------------------------------------------------------------------------------------------------------------------------------------------------------------------------------------------------------------------------------------------------------------------------------------------------------------------------------------------|----------------------------|-----------------------------------------------------------------------------------------------------------------------------------|---------------------------------------------|-------------------------------------------------------------------------------------------------------------------------------------------------------------------------------------------------------------------------------------------------------------------------------------------------------------------------------------------------------------------------------------------------------------------------------------------------------------------------------------------------------------------------------------------------------------------------------------------------------------------------------------------|
| Griffiths, 2016 [45] | Cluster randomised control trial                                                     | To test the hypothesis that a culturally specific education programme, adapted from promising theory-based interventions developed in the USA, would reduce unscheduled care for South Asians with asthma in the UK                                                                                                                                                                                 | Primary care (asthma)      | 375 total (183 intervention group and 192 in control group)                                                                       | London boroughs of Tower Hamlets and Newham | The Physician Asthma Care Education (PACE) programme and the Chronic Disease Self-Management Program (CDSMP) was adapted for use with South Asians (however, limited information was provided on how it was adapted)                                                                                                                                                                                                                                                                                                                                                                                                                      |
| Bush, 2014 [46]      | Cluster randomised control trial                                                     | This proof-of-concept study aimed to test this hypothesis using a cluster randomised controlled trial (RCT); to our knowledge, this is a novel study aimed at increasing uptake of retinopathy screening in a hard-to-reach and high-risk population group                                                                                                                                          | Primary care (diabetes)    | Number of South Asians contacted and screened not reported                                                                        | Coventry                                    | Link workers telephoning patients that fail to attend screening appointments – minimal details provided about the link worker's backgrounds/linguistic skills etc.                                                                                                                                                                                                                                                                                                                                                                                                                                                                        |
| Crawshaw, 2023 [47]  | Mixed methods: Qualitative and co-design                                             | To construct a community-based participatory research (CBPR) study with Congolese migrants in the United Kingdom to understand the complex mechanisms influencing their COVID-19 vaccination attitudes, beliefs and behaviours, and use behavioural theory and participatory co-design methods to translate these findings into a tailored intervention to strengthen their COVID-19 vaccine uptake | Primary care/public health | 32 participants in the qualitative interviews and 16 in the co-design workshops (2x 8)                                            | London borough of Hackney                   | Plan/components developed using CBRP - Intervention component 1: Community-led workshops (opportunities to have two way conversations about vaccines, sessions to be hosted by local community organisations with specialists and healthcare professionals as guests), intervention component 2: Short plays (use of storyboards to tell stories about vaccines using humour and cultural references), Intervention component 3: Posters and flyers (again using cultural references, appropriate colours and images to convey messages) – other components were identified by the groups as potential for behaviour change opportunities |
| Offman, 2014 [48]    | Observational                                                                        | To report on a telephone reminder intervention in Newham taking place in the context of the 2010 round of screening, in the NHS Breast Screening Programme                                                                                                                                                                                                                                          | Primary care/public health | Women living in Newham that were eligible for breast screening. Used aggregate GP data so does not provide number of participants | London borough of Newham                    | A charity (Community Links) in Newham was commissioned to complete telephone intervention invitation. Local women understanding the socio-cultural profile of the community in Newham and speaking combinations of the following languages spoken in Newham were recruited: Hindi, Urdu, Punjabi, Gujarati, Bengali, Somalia, French, Spanish and English. They attended one training programme covering a general overview on breast cancer and breast cancer screening, the benefits and risks of screening, informed consent and information governance                                                                                |
| Roche, 2018 [49]     | Mixed methods: Qualitative study and feasibility cluster randomised controlled trial | To [1] develop a new intervention to facilitate timely diagnosis of dementia in Black African and Caribbean populations, and [2] evaluated its acceptability and [3] its delivery in a feasibility cluster randomised controlled trial (RCT)                                                                                                                                                        | Primary care/elderly care  | 47 participants of Black African, Black Caribbean or Black British heritage                                                       | London – (5x London boroughs)               | Leaflet entitled "Getting help for forgetfulness" with accompanying letter from GP practice reassuring that the letter wasn't based on information from GP but that it included advice about forgetfulness and when/how to seek help                                                                                                                                                                                                                                                                                                                                                                                                      |

(Continued)

Table 1. (Continued)

| Citation            | Study design               | Study aim                                                                                                                                                                                                                                                                              | Health service            | Population                                                                                                               | Area of the UK                | Intervention                                                                                                                                                                                                                                                                                                                                                                                                                                                                             |
|---------------------|----------------------------|----------------------------------------------------------------------------------------------------------------------------------------------------------------------------------------------------------------------------------------------------------------------------------------|---------------------------|--------------------------------------------------------------------------------------------------------------------------|-------------------------------|------------------------------------------------------------------------------------------------------------------------------------------------------------------------------------------------------------------------------------------------------------------------------------------------------------------------------------------------------------------------------------------------------------------------------------------------------------------------------------------|
| Parveen, 2017 [50]  | Qualitative (focus groups) | The objectives were to establish whether Alzheimer's Society Information Programme for South Asian families (IPSAF) had an immediate and medium-term impact on those who attended and how it impacted on the wider family and the person with dementia                                 | Primary care/elderly care | 42 participants of Indian, Pakistani, and Bangladeshi heritage                                                           | 7 locations across the UK     | IPSAF is a culturally adapted programme for people with dementia and their family/carers. Aiming to improve the knowledge, skills, and understanding of South Asian carers supporting a relative with dementia. The programme is delivered by an Alzheimer's Society facilitator in partnership with a local South Asian community organisation and consists of 4 sessions addressing understanding dementia, legal and money matters, looking after others, and looking after yourself. |
| Robinson, 2022 [51] | Co-design workshops        | Through codesign workshops, this study seeks to integrate the voices of those people from ethnic minority populations to gain better insight and create recommendations, on improving access to medicines advice from community pharmacies for people from ethnic minority communities | Primary care (pharmacy)   | 12 participants belonging to ethnic minority groups (non White British) taking one or more regular prescription medicine | North of England              | Codesign workshops developed 3x recommendations: Recommendation 1: Delivering and providing culturally competent medicines advice. Recommendation 2: Building awareness of accessing medicines advice from community pharmacies. Recommendation 3: Enabling better discussions with patients from ethnic minority communities                                                                                                                                                            |
| Lamb, 2015 [52]     | Qualitative evaluation     | To develop and evaluate a model for the community engagement component of the complex intervention, focusing on developing relationships with stakeholders, their engagement with the issue of access to mental health and with the programme through the Community Engagement model.  | Community mental health   | 4x community focus groups with 15, 11, 25, 17 participants but no further information about participants                 | Longsight, Greater Manchester | Mental Health Champions were engaged to undertake targeted outreach within the local community; deliver 2-hourly psychological interventions linked with mild–moderate physical activities over six weeks – delivered by mental health practitioners and co-facilitated by an expert patient; and on-going monitoring and evaluation of the project (limited other details)                                                                                                              |
| Lwembe, 2017 [53]   | Qualitative                | This study seeks to build an understanding of whether and how lay contributions from community and well-being champion (CWBC) have impacted on the social determinants of mental health, including the system within and through which the intervention was delivered                  | Community mental health   | 25 Black and minority ethnic service users accessing mental health (community services)                                  | West London                   | Mental Health Champions were engaged to undertake targeted outreach within the local community; deliver 2-hourly psychological interventions linked with mild–moderate physical activities over six weeks – delivered by mental health practitioners and co-facilitated by an expert patient; and on-going monitoring and evaluation of the project                                                                                                                                      |

(Continued)

Table 1. (Continued)

| Citation             | Study design                                           | Study aim                                                                                                                                                                                                                                                                                                                                                                                                                                                                                                                                         | Health service          | Population                                                                                                                                  | Area of the UK                  | Intervention                                                                                                                                                                                                                                                                                                                                                                                                                                                                                                                                                                                                                                          |
|----------------------|--------------------------------------------------------|---------------------------------------------------------------------------------------------------------------------------------------------------------------------------------------------------------------------------------------------------------------------------------------------------------------------------------------------------------------------------------------------------------------------------------------------------------------------------------------------------------------------------------------------------|-------------------------|---------------------------------------------------------------------------------------------------------------------------------------------|---------------------------------|-------------------------------------------------------------------------------------------------------------------------------------------------------------------------------------------------------------------------------------------------------------------------------------------------------------------------------------------------------------------------------------------------------------------------------------------------------------------------------------------------------------------------------------------------------------------------------------------------------------------------------------------------------|
| Mantovani, 2017 [54] | Qualitative                                            | This study seeks to build an understanding of whether and how lay contributions from community and well-being champion (CWBC) have impacted on the social determinants of mental health, including the system within and through which the intervention was delivered                                                                                                                                                                                                                                                                             | Community mental health | 13 community champions were recruited to the study                                                                                          | South London                    | The community and wellbeing champions engaged in formal group work and informal one-to-one conversation (favouring group work as this encouraged engagement in sensitive topics). The CWBCs hosted 40 groups in the duration of the study. CWBCs had different styles of intervention which can be divided into: (i) talking to people informally about mental health as part of their daily lives; (ii) providing more intensive support to individuals; (iii) imparting knowledge on how to take control over one's own health; and (iv) partaking in or managing/leading activities, groups or events in the associated Faith Based Organisations. |
| McEvoy, 2017 [55]    | Mixed methods                                          | This paper offers a critical reflection upon an initiative that sought to improve access to an NHS funded primary care mental health service to one 'under-served' population, an Orthodox Jewish community in the North West of England                                                                                                                                                                                                                                                                                                          | Community mental health | 12 stakeholders (3 patients) involved in the project                                                                                        | Salford                         | "Eis Ledader" project (which means 'time to talk' in Hebrew) was developed with the aims to reduce the stigma in the Jewish community of seeking help for mental health needs, the project did this through the following overarching aims: establishing an arms length relationship, building a collaborative partnership and building a mature collaborative partnership                                                                                                                                                                                                                                                                            |
| Owit, 2014 [56]      | Mixed methods – ethnographic and quantitative analysis | This paper reports on the findings that demonstrate the effectiveness of the cultural consultation service (CCS) model in facilitating the learning of cultural competence skills of clinicians within clinical encounters                                                                                                                                                                                                                                                                                                                        | Community mental health | 30 clinicians attended 15 cultural competence training sessions                                                                             | London borough of Tower Hamlets | Cultural Consultation Service (CCS) – provided cultural competence training and also consulted regarding patients (sat in on sessions) and provided advice about patients                                                                                                                                                                                                                                                                                                                                                                                                                                                                             |
| Low, 2024 [57]       | Mixed methods service evaluation                       | This paper presents an evaluation of the feasibility and acceptability of delivering the HEAL-D Online service using an online platform delivered by the National Health Service (NHS) in South London. The evaluation aimed to examine the following factors: (i) acceptability to service users; (ii) feasibility to staff delivering the online programme; (iii) feasibility of digital participation for service users; (iv) potential benefits to service users following participation; (v) potential future improvements to HEAL-D Online. | Primary care (Diabetes) | 53 HEAL-D service users completed a post course questionnaire, and 14 service users and 7 service delivery staff participated in interviews | South London                    | HEAL-D online is comprised of: information about health consequences and benefits of target behaviours including self-management principles, social support and social comparison (sharing success and failures), demonstration, training and instruction on how to perform behaviours, graded exercise tasks, credible sources and social comparison (development of videos featuring patients and HCPs), goal setting (SMART) and feedback on outcomes of behaviour, self-monitoring and action planning                                                                                                                                            |

(Continued)

Table 1. (Continued)

| Citation            | Study design                               | Study aim                                                                                                                                                                                                                                                                                                                                                                                                                                                                                       | Health service          | Population                                                                                                                                 | Area of the UK                             | Intervention                                                                                                                                                                                                                                                                                                                                                                                                                                                                                               |
|---------------------|--------------------------------------------|-------------------------------------------------------------------------------------------------------------------------------------------------------------------------------------------------------------------------------------------------------------------------------------------------------------------------------------------------------------------------------------------------------------------------------------------------------------------------------------------------|-------------------------|--------------------------------------------------------------------------------------------------------------------------------------------|--------------------------------------------|------------------------------------------------------------------------------------------------------------------------------------------------------------------------------------------------------------------------------------------------------------------------------------------------------------------------------------------------------------------------------------------------------------------------------------------------------------------------------------------------------------|
| Moore, 2023 [58]    | Feasibility (pre-test post-test)           | To determine the feasibility of undertaking a community multicultural healthy eating education and cooking intervention featuring traditional African Caribbean foods at a community organization by evaluating service users' and staff perceptions of the acceptability and relevance of using resources in real life/practice. The second aim was to evaluate the potential impact of the intervention and resources on participant's food and cooking confidence, knowledge, and behaviours | Primary care (Diabetes) | 30 participants consented to attend a workshop and 22 complete the questionnaires                                                          | Leeds                                      | 1 hour discussion group using resources (East Well guide that had been culturally adapted) and 3 hour cooking session to put the recipes into action                                                                                                                                                                                                                                                                                                                                                       |
| Lowry, 2022 [59]    | Protocol of Low et al. (2024)              | The purpose of this study is to describe the methods to explore the [1] feasibility and acceptability of a virtual delivery model for HEAL-D in south London and [2] factors affecting its scale-up across other areas in England                                                                                                                                                                                                                                                               | Primary care (Diabetes) | Protocol plan to recruit self-identified Black African or Caribbean members of the public with T2DM                                        | South London                               | HEAL-D online is comprised of: information about health consequences and benefits of target behaviours including self-management principles, social support and social comparison (sharing success and failures), demonstration, training and instruction on how to perform behaviours, graded exercise tasks, credible sources and social comparison (development of videos featuring patients and HCPs), goal setting (SMART) and feedback on outcomes of behaviour, self-monitoring and action planning |
| Flanagan, 2019 [60] | Cluster randomised control trial           | Aimed to determine whether incentivising and supporting primary-care physicians in areas with a high density of migrants increases the numbers of adult migrants screened for viral hepatitis                                                                                                                                                                                                                                                                                                   | Primary care            | 51,773 randomly selected eligible patients in the intervention groups in London and Bradford, letters were sent to 43,585 (84.2%) patients | Bradford, South East and North East London | HepFREE – unclear if this provided any different intervention. GPs in participating sites were given a fee of £500 for signing up and £25 per each participant that they enrolled into the study                                                                                                                                                                                                                                                                                                           |
| Krasuska, 2023 [61] | Stepwise approach intervention development | To use a stepwise approach that was informed by the Six Steps in Quality Intervention Development framework, which consisted of gathering evidence through literature review and focus groups (step 1), developing a program theory for the intervention (step 2), and finally developing the content of the text messages and an accompanying delivery plan (step 3).                                                                                                                          | Primary care (Diabetes) | 25 people took part in 3 focus groups                                                                                                      | Scotland                                   | Culturally tailored text messages to prevent T2DM for one specific South Asian population, women of Pakistani origin living in Scotland                                                                                                                                                                                                                                                                                                                                                                    |

<https://doi.org/10.1371/journal.pone.0340079.t001>

## Effectiveness and acceptability of interventions

Effectiveness of interventions was explored by 12 studies [31,36–38,43–45,48,56–58,60]. The studies that assessed effectiveness completed interventions using telephone reminders, GP incentives, culturally tailored programmes for depression, schizophrenia, diabetes, asthma and dental health, educational videos about heart disease and viral hepatitis screening, and a cultural consultation service. Positive results were reported by all studies, with only two studies reporting a neutral effect in some of their measures [44,45]. Table 2 provides further details of interventions and their effectiveness.

Acceptability of interventions was explored by five studies [33,38,40,49,58]. The HEAL-D intervention in person [33] and the adapted online version [57] were both well attended and acceptable to Black Caribbean, African and Black British

**Table 2. Effectiveness of included interventions.**

| Intervention                                                                                                                                            | Study design                     | Population                                                                                                                | Effectiveness results                                                                                                                                                                                                                        |
|---------------------------------------------------------------------------------------------------------------------------------------------------------|----------------------------------|---------------------------------------------------------------------------------------------------------------------------|----------------------------------------------------------------------------------------------------------------------------------------------------------------------------------------------------------------------------------------------|
| Culturally tailored telephone reminder intervention [48]                                                                                                | Observational study              | Ethnic minority women eligible for breast screening                                                                       | Breast screening uptake was higher in participating practices                                                                                                                                                                                |
| HepFREE - GPs in participating sites were given a fee of £500 for signing up and £25 per each participant that they enrolled into the study [60]        | Cluster randomised control trial | “Migrants” in participating GP practices                                                                                  | Hepatitis screening uptake was higher in participating practices                                                                                                                                                                             |
| The “Positive Health Programme” a culturally tailored intervention for postnatal depression [38]                                                        | Feasibility study                | South Asian women with postnatal depression                                                                               | Reduction in depression post intervention                                                                                                                                                                                                    |
| The “Positive Health Programme” a culturally tailored intervention for postnatal depression [43]                                                        | Randomised control trial         | South Asian women with postnatal depression                                                                               | Reduction in depression but only a significant difference in women that had attended >four sessions                                                                                                                                          |
| Culturally tailored video to provide education about coronary artery disease [36]                                                                       | Pre-test/post-test pilot study   | Bangladeshi women attending a community centre                                                                            | Statistically significant increase in knowledge post intervention                                                                                                                                                                            |
| Culturally tailored video to increase awareness of Hepatitis screening [44]                                                                             | Feasibility study                | South Asian migrants                                                                                                      | No improvement to knowledge of hepatitis screening                                                                                                                                                                                           |
| Culturally adapted Family Intervention (CaFI) [31]                                                                                                      | Mixed methods feasibility study  | African-Caribbean service users diagnosed with schizophrenia                                                              | The mean EQ-5D-5L utility index was 0.74 at baseline, rising to 0.82 post intervention. Health utility index scores improved significantly after intervention (mean difference 0.09, 95% CI 0.02 to 0.17; $p < 0.05$ , bootstrapped t-test). |
| Healthy Eating and Active Lifestyles for Diabetes (‘HEAL-D’) adapted to be delivered online [57]                                                        | Mixed methods service evaluation | Black Caribbean, Black African or Black British people with Diabetes                                                      | Participants felt more confident in controlling their diabetes and managing their diet post intervention                                                                                                                                     |
| Cooking intervention using culturally tailored cooking book [58]                                                                                        | Feasibility (pre-test post-test) | Intervention tailored to African Caribbeans, but no ethnic minority groups were excluded from being involved in the study | Familiarity of healthy eating guidance had significantly increased post intervention (pre-intervention 36%, $n = 8$ to post-intervention 100%, $n = 22$ )                                                                                    |
| Cultural consultation service (CCS) facilitating the learning of cultural competence skills of clinicians within clinical encounters [56]               | Mixed methods                    | Targeted clinicians working with people from different cultural backgrounds in primary care                               | Significant improvement in clinician self-rated cultural competence, but they did not assess if this translated to patient outcomes                                                                                                          |
| Culturally tailored intervention to improve dental hygiene in mothers [37]                                                                              | Quasi-experimental study         | Chinese migrant mothers                                                                                                   | Improved attitudes to baby teeth brushing                                                                                                                                                                                                    |
| The Physician Asthma Care Education (PACE) programme and the Chronic Disease Self-Management Program (CDSMP) was adapted for use with South Asians [45] | Cluster randomised control trial | South Asians after an asthma exacerbation                                                                                 | Reduction in time to first review, improvement in asthma related quality of life and self-efficacy (at 3 months) but did not show a difference in time to first unscheduled attendance for asthma which was their primary outcome            |

<https://doi.org/10.1371/journal.pone.0340079.t002>

participants. Moore and colleagues [58] found that participants attending their cooking intervention also had high levels of satisfaction. A written and posted information leaflet for dementia awareness in Black African and Caribbean populations was found to have high levels of acceptability (93.6% n=47) [49]. A culturally adapted behavioural activation programme for depression was found to be acceptable to Muslim participants [40]. Finally, the “Positive Health Programme” was also reported as acceptable to participants in a feasibility study [38].

### PROGRESS-Plus framework

Analysis using the PROGRESS-Plus framework focused on study eligibility criteria (inclusion and exclusion), baseline characteristics and subgroup analyses (S3 Appendix). For eligibility criteria, under **Place of residence** one study excluded care home residents [49], another excluded those living in temporary accommodation [47]. In relation to **Race/ethnicity/culture** two studies excluded people that were not 1<sup>st</sup> generation South Asian immigrants [36,44], another excluded people that were not 1<sup>st</sup> generation immigrants from the Democratic Republic of Congo [47] and two studies excluded those not self-identifying as African, Caribbean or Black British [31,49]. **Age** exclusions were utilised by several studies, with seven studies excluding people below 18 years [31,33,36,38,45,51,61], and two studies excluding people below 16 years [42,62], one study excluded those below 25 years [35] and another study those below 50 years old [49]. Many **Disability** exclusion factors were identified, two studies excluded those with severe physical or learning disabilities [38,43], three studies excluded those with severe mental health problems (including depression and psychosis) [33,38,53]. Four studies in community mental health excluded people that were actively suicidal or deemed a high risk to themselves or others [31,38,43,45]. One study excluded those with mobility problems preventing attendance of the programme and “complex clinical needs” [33]. Another excluded those with chronic conditions that would limit engagement in the diet and activity behaviour modification intervention [58]. Finally, two studies excluded people with cognitive impairments, dementia diagnosis or those lacking capacity to consent [31,49]. The **Plus** aspect of the framework identified one study that excluded people that were pregnant and those participating in another research study [33] and four studies excluded patients due to language proficiency [31,44,58,61].

In relation to baseline characteristics, **Place of residence** was reported as “rented, owned or shared” by one study [45]. **Race/ethnicity/culture** was well reported in baseline characteristics with groups as follows, Roma and Traveller communities [34], Black African, Caribbean or Black British [28,31,33,49,54,57,58,60], Asian Caribbean [49], “Asian” [28], South Asian [44,50,51,60], Eastern European [60], White British [51], “Other” [58,60], Arab, Mixed Arab and Turkish [51], Vietnamese, Chinese, Albanian, Nigerian, Afghan, Yemeni [39]. Generation in the UK (1<sup>st</sup>, 2<sup>nd</sup>, 3<sup>rd</sup>, 4<sup>th</sup>) was reported by two studies [38,45]. Followed by **Occupation**, where four studies reported employment status [31,33,38,49], three studies reported occupations from a list or classification [34,38,50], one study reported if participants were sick, disabled or in receipt of welfare benefits [58].

Three studies included subgroup analyses of their participants [28,45,58]. One study using peer outreach workers to increase organ donation in ethnically underrepresented communities had a higher sign-up rate of Asian people (11%) compared to Black people (2%) [28]. A study delivering an asthma intervention to South Asians [45] found that ethnicity moderated the intervention effect ( $P=0.046$ ), “Other South Asians” (Indian, Pakistani or Sri Lankan) had the best outcome (hazard ratio of 1.55), followed by the Bangladeshi group (hazard ratio of 1.11) and the poorest outcomes were seen in the British Bangladeshi group (hazard ratio of 0.72). They found that the role of immigrant generation in the UK also moderated the intervention effect, with first generation immigrants in the intervention group having the best outcomes (hazard ratio of 5.55), followed by first generation immigrants in the control group (hazard ratio of 4.56) and then higher generation immigrants in the intervention group (hazard ratio of 3.12). Finally, they explored the role of English fluency and found weak evidence that this moderated the intervention effect ( $P=0.083$ ). One other study looked at a healthy eating and cooking intervention for African Caribbean groups [58] and found those belonging to African Caribbean ethnic groups had a better response to the intervention than those from other groups. They did not find a significant difference in intervention response when comparing educational levels across the whole group and within ethnic groups [58].

## Thematic analysis

This review analysed intervention studies using the five service domains in the patient-centered access framework [14], (S4 Appendix). There was a thorough spread across the five domains of the patient-centred access framework in the complex interventions that were discussed in the articles. Approachability and acceptability had the most supporting sources (30 and 27 respectively). With affordability having the least (16 supporting sources), followed by appropriateness (20 supporting sources) and availability and accommodation (22 supporting sources). The first step of accessing and engaging with a health service is knowing that a particular service exists (approachability) [14]. Eight themes aiming to increase awareness of health services were identified were supported by 30 sources (outreach, education about health services, sign posting to other services, ambassadors/community champions, collaboration with community links, advertisements, screening through health services, communication via phone). The most common activity to increase approachability was outreach to community spaces/organisations (n = 12) [28,32,33,41,42,44,47,51,53–55,58], places of worship (n = 4) [32,33,44,54], an Asian bridal show [28], dementia roadshows [50], community activities such as yoga [28] and support groups [53]. Advertising in Asian supermarkets [32], community centres [33], on the radio [29] and on social media was also used (n = 5) [30–32,51,63]. Community ambassadors/champions were developed by nine studies to form stronger community links and raise awareness [32,33,42,47,52–55,61]. Two studies employed telephone outreach workers for NHS health checks [27,48], while another study utilised outreach workers with Gypsy, Roma, and Traveller communities to improve vaccination uptake [34]. Other studies (n = 9) utilised existing health service structures to identify and contact patients that through General Practitioner/primary care contacts, or those who presented to urgent care or Accident & Emergency departments [27,33,44–46,48–50,60].

The second domain is acceptability [14], which refers to cultural and social factors needed for people to accept services. Thirteen themes were identified supported by 27 sources (cultural adaptations, building trust and relationships, gender split sessions, culturally matched staff, using religious spaces, familiar staff, incorporating social support, activities with minimal social barriers, engagement/information film, content verified by native speakers, consideration of literacy levels, adaptation of language, incorporating cultural and religious values). Religious spaces were utilised to increase cultural and social acceptability of interventions [32,38,41]. Cultural adaptations of programmes were used in nine studies [30,31,38,40,41,45,49,57,58], for example culturally adapted dietary advice to support diabetes, incorporating Caribbean examples instead of Western ones, to enhance relevance and participant adherence [33,41,57]. Another eight studies discussed building trust, therapeutic alliance and relationships [30–32,41,47,50,54,55]. Gender split interventions was considered by three studies [32,54,55], however seven studies targeted women specifically [35–39,42,48]. Matching staff and service users by ethnicity, cultural backgrounds or religious views was extensively discussed [28,29,35,37,40,48,50,51,56]. Cultural and ethnic matching was investigated by two studies, revealing differing views among service users, leading to the provision of a choice in the studies [40,55]. One study with Jewish communities [55] considered language adopting terms such as “well-being” and “self-improvement” rather than anxiety or depression which are less accepted by these communities. Another study [32] employed positive language, referring to participants as “learners” to encourage engagement, rather than emphasising low literacy levels. Studies also discussed aligning interventions with existing community groups, considering religious and faith barriers such as dates of religious events [31,32,55].

Availability and accommodation, the third domain in the framework [14] was identified with six themes supported by 22 sources (flexible appointments, local spaces utilised, childcare facilities provided, transport provided, intervention delivered online and home visits – including delivery at an immigration centre). This domain pertains to the physical accessibility of health services, including geographic location, timing, appointment duration, and flexibility concerning work or childcare. Local community spaces such as places of worship, community centres and local parks were used in multiple studies [32,33,35,36,41,44,47,51,54]. Three studies discussed having flexible appointments to meet patient preferences such as work and family commitments [32–34]. Home visits were completed by three studies: one looked at dental care

of Chinese undocumented migrant mothers [37], another exploring postnatal depression [38] and the final one provided a specialist maternity service to migrant mothers in an immigration accommodation centre [39]. Three studies delivered interventions in a community centre with childcare services [38,42,43]. A diabetes intervention was delivered online to African Caribbean populations [57,59] and another study designed a text messaging intervention of diet and activity advice [61].

The fourth domain of the framework is affordability [14], which relates to people's ability to spend money, resources and time accessing health services. This domain identified 10 themes supported by 16 sources (flexible appointments, local community spaces, childcare facilities, local community spaces used, intervention in initial accommodation centre, intervention delivered online, home visits). Direct overhead costs such as transportation was discussed in four studies [32,38,39,43]. Travel costs were eliminated by utilising home visits in two studies [37,38]. Location of interventions was rarely discussed with regards to affordability for participants however, many studies utilised community spaces which may have indirectly supported affordability. There was minimal discussion of indirect participant costs. Three studies discussed how childcare was provided in the same community centre as the intervention [38,42,43]. Two studies reported the interventions were free [32,35] or free for the first six months [32]. One intervention was delivered online which was categorised in affordability [57,59].

Appropriateness, the fifth domain [14], is the fit between services and client needs, such as timeliness and care given to assess health problems and determine correct treatment. This domain identified 10 themes supported by 20 sources (cultural training of staff, multilingual facilitators, consideration of religious beliefs, ethnically matched staff, personalised care, self-referral, joining up of services, intervention provided after health event and use of interpreters). Staff cultural training was discussed by five studies [30–32,34,56] which included for example appropriate body language and culturally appropriate dress [32]. Two studies directly discussed the use of interpreters [39,51]. Six studies discussed the use of multilingual facilitators [27,32,36,38,42,50]. Four studies addressed low literacy levels by delivering interventions through pictures and/or verbal means [32,36,49,58]. Two studies delivered tailored or personalised care [37,40].

The thematic analysis identified three themes that did not fit into the patient-centred access framework, supported by four sources. These included public engagement, longevity of programmes and community involvement in planning healthcare interventions [31–34,47]. Dyson et al. [34] discussed an intervention with multiple components which supported each other and therefore success relied on all components being incorporated. Another study discussed the longevity of programmes, since short term interventions do not support ethnically underrepresented communities long term [32]. This is especially relevant considering many interventions targeted long-term conditions such as diabetes. Public engagement and community involvement in planning and delivering the intervention was discussed by several studies due to its importance in developing relationships and ensuring relevance to the target population [30–32,34,41,47].

## Discussion

### Main findings

Healthcare access and engagement for ethnically underrepresented communities is a complex and multifactorial issue requiring complex interventions. This scoping review synthesised the published literature and mapped intervention components to the five domains of the patient-centred access framework. Overall, 35 studies were identified which were predominantly based in primary care/mental health services with interventions more frequently addressing approachability and acceptability from the patient-centred access framework with affordability and appropriateness less frequently addressed. The evidence was based on inclusive samples with equity-based factors limited in eligibility criteria.

### Comparison to other research

Interestingly, a scoping review of international studies exploring access and engagement [12] found that the majority of the included interventions targeted approachability, availability and affordability, in contrast to this review, which found that

approachability and acceptability were the domains supported by most sources. This perhaps may relate to the fact that USA healthcare is not free at point of access in comparison to the NHS, altering the needs of non-UK populations. International studies discuss designated staff for outreach-based roles, including care co-ordinators and integrating teams, such as linking primary and secondary care for patients receiving care from multiple services [12]. Another scoping review [64] explored the role of community care navigators in Canada and whilst it found supporting evidence, only USA literature was identified. The role of care coordinators has not featured in UK literature in this review and may be a worthwhile focus of future research. This could be especially pertinent as early onset multi-morbidity has been found to be more prevalent in ethnically underrepresented communities in the UK compared to White British groups [65]. Many of the international studies [12] had larger sample sizes than UK studies included in this review. For example, one study explored creating a managed care plan for USA uninsured patients and had a sample size of 23,143 people [66]. This perhaps identifies that UK literature is in its infancy in comparison to USA literature of complex interventions to support health equity.

Systematic literature reviews in this area are dominated by studies completed in USA, despite being completed by authors in other high-income countries with publicly funded healthcare. A review of interventions for care-seeking behaviour in migrants by Swedish authors identified 16 studies – one Canadian and the rest USA [67]. They identified promise with community-based interventions but concluded that further research using robust study designs is required. Similarly, a review of Indigenous communities in USA and Australia identified lack of effectiveness assessment and called for more rigorous study designs [68]. However, a Canadian review of barriers and strategies for Indigenous communities identified the following strategies: financial support, education and employment, culturally sensitive information and systems and involvement of Indigenous communities and elders in policy processes [69]. A review of cultural adaptations for behaviour change (smoking, diet, physical activity) from the Netherlands identified 17 studies, all USA [70]. Another review of interventions for culturally and linguistically diverse populations included 24 studies (19 USA and one each in Canada, UK, Australia, Switzerland, Mexico) concluded that culturally trained bi-lingual health workers should be considered as part of potential solutions [71]. A systematic review from Finland identified Nordic studies but the review was focused specifically on cultural competence and outcomes were aimed at staff confidence/competence rather than that patient experience or outcomes [72].

In recognition of the lack of high-quality research in this area a Delphi study was completed in Denmark recommending more co-designed interventions, culturally and linguistically appropriate services, and policies targeted towards health literacy, linguistic, cultural and social differences [73]. Other literature (not reviews) includes a qualitative project looking at dementia in Norway which concludes that inclusive policies to promote patient centred approaches in ethnically underrepresented communities are required for appropriate dementia care [74]. A culturally tailored dementia education programme in Denmark also demonstrated success, however they did not assess long term knowledge post intervention [75].

## Interpretation

This review has demonstrated that complex interventions have been applied through multiple healthcare services, targeting ethnically underrepresented communities and have a key role to play in health inequalities. However, it is challenging to draw conclusions about the interventions included in this review due to effectiveness only being assessed in 12/35 studies (34%). Whilst the 34% that describe effectiveness mostly describe positive results (with few describing neutral results and none reporting negative results), most studies in this review do not examine how effective their interventions are. This is especially challenging when it is understood that whilst interventions aim to reduce inequalities, they also have the potential to generate them [76]. In a review of intervention generated inequalities in primary care, Gkiouleka and colleagues found a lack of robust evidence to investigate the outcomes of complex interventions [76]. They concluded that there are five factors that interventions in primary care should consider: being connected, intersectional, flexible, inclusive and community centred [76]. Many of these factors are echoed in the components of interventions included in this review supporting the role of complex interventions in helping to improve health equity.

Health inequalities arise from multiple intersecting factors beyond socioeconomic status (e.g., gender and ethnicity) and are shaped by structural elements such as education systems, political frameworks, housing policies and power imbalances [77]. Therefore, interventions aiming to reduce these inequalities require multifaceted components that are designed to target these intricate elements in particular groups, considering the complex interplay of factors (intersectionality). This is reflected in cultural adaptation of programmes, featured in several studies in this review. For example, interventions demonstrated positive effectiveness and included cultural adaptations for 1<sup>st</sup> generation Bangladeshi women [36], South Asians with postnatal depression [38], South Asians with asthma [45], Black African, Caribbean or Black British people with diabetes [33,57,58] and ethnic minority women broadly [48]. Acceptability of cultural adaptations is also supported by studies in this review, further supporting the role of adapting services or programmes [40,57]. One significant challenge of “cultural adaptations” of interventions is the often limited detail in reporting of how these adaptations are completed, lacking information about how the adaptations make the intervention more “culturally acceptable”.

This limits potential learning from studies, reproducibility and application into future intervention development.

It also is important to consider the wider political and power structures that contribute or drive health inequalities and the impact that this has on communities. These wider power structures give a background to the importance of using community centred approaches to build trust and relationships. Trust, therapeutic alliance and relationship building were directly discussed by five articles in this review [30–32,47,55]. However, utilising community links, community ambassadors or outreach was used by 14 studies [28,32,33,41,42,44,47,51–55,58,61] and demonstrates the importance that many interventions place on working *with* target communities. Edge and colleagues were the only study describing relationship building that evaluated their intervention effectiveness [31]. They demonstrated a positive effect of their culturally adapted family intervention for Black African Caribbean people with schizophrenia [31]. Participatory methods were also utilised by several studies in this review, perhaps a methodology chosen to help to build trust and devolve power through the study process by involving target populations [33,34,47]. Whilst the importance of trust and relationship building was stressed [32], the matter of *how* to build trust was not reported on in detail. This leaves the question: how do we build trust and therapeutic alliance with ethnically underrepresented communities? And does this need to be approached differently for different ethnically underrepresented communities? Trust building with communities may also be challenging to research as it may involve activities that are difficult to document and evaluate. In their review, Cu et al. [78] also found that numerous studies lacked details on trust-building and engaging service users. Building trust is directly linked to the longevity of interventions. This is especially challenging with long term conditions such as diabetes which will involve lifelong behaviour and lifestyle changes. However, few projects evaluated outcomes beyond the short-term. It is therefore uncertain whether the interventions effectively ensure the trust built is preserved in the longer term. This challenge was highlighted by Such and colleagues who identified several short-term physical activity interventions but also highlighted how the three interventions they used as case studies also all aimed to build capacity to support long term delivery of interventions in the community [32].

Since only 12/35 studies assessed effectiveness, the potential for evidence-based adaptation is limited. Therefore, participation of target populations in intervention designs or adaptations becomes even more important to ensure that interventions will meet the needs of the communities they aim to serve. This highlights the further importance of participatory methodologies such as co-design to involve service users within intervention design and adaptation. Three studies included in this review utilised participatory methodologies [32,48,55], however 14 studies utilised community links, ambassadors or outreach [28,32,33,41,42,44,47,51–55,58,61]; highlighting the importance of participation within intervention (and research study) design and development.

It is well documented that structural systems of power contribute towards health inequalities [79,80]. Racism is pervasive and embedded within structures of society [81]. Structural racism is normalised and is embedded within societal norms, laws, cultures and institutions [80,82]. The Institute of Health Equity [79] highlights racism as having three key contributions towards poorer health over the life course. Firstly, racism directly damages physical and mental health.

Secondly, racism may be linked to socioeconomic disadvantage and negative effects of social determinants of health. The third way, most relevant to this review, racism damages health through the operation of systems including health care system. Given this damaging effect that healthcare systems themselves can have on health inequalities it is a significant gap that none of the literature identified in this review of ethnically underrepresented communities mentions or discusses racism. The absence of discussion about racism across the included studies is especially striking given that many were authored by individuals working within institutions that both shape and sustain health inequalities [82]. Power often exists invisibly to those who hold it but is felt acutely by those who lack it; future research must make power visible and critically examine how it influences both research and service design itself.

The patient-centred access framework [14] provided an excellent framework for this scoping review. Selected for its comprehensive analysis of access and engagement in health services, this framework is commonly employed in studies focusing on underrepresented groups' access [12,83,84]. However, some factors are not included in this framework and were not identified in the inductive thematic analysis that was independent of the framework. This includes the issue of power dynamics, an important factor when considering research and engagement with underrepresented communities and those with issues trusting research and/or healthcare. Interventions may more effectively address power imbalances by collaborating with communities through engagement activities and participatory methods, which may require effort to support engagement [2]. An Australian group discuss in detail the steps that they took to optimise engagement of ethnically underrepresented communities in the co-design process of two of their cancer trials which included inviting seldom heard voices and providing adequate resources [85]. Considering power dynamics is especially pertinent when considering the structural and systemic causes of health inequalities. Whilst the studies utilising participatory methodology will have considered the role of power within their research design, other studies did not discuss this. For example, Flanagan and colleagues provided an incentive to doctors in primary care to increase recruitment of "migrant" patients to viral hepatitis screening [60]. Whilst this study did see an increased uptake in participating GP practices this intervention fails to address the complex factors surrounding health inequalities such as barriers to accessing healthcare, discriminatory practices, or policies that marginalise specific groups [77]. More holistic approaches should be considered such as the complex intervention (HEAL-D) developed through extensive community engagement and participatory methods for Black African, Caribbean or Black British people with Diabetes. This intervention included components across all five of the patient centred access framework domains [33]; was shown to be highly acceptable [33], and to significantly improve participant confidence in controlling their diabetes and managing their diet in the adapted online version.

Understanding which ethnically underrepresented communities were targeted by these studies helps to appreciate how generalisable the results may be to other groups and communities. Overall, the studies employed wide eligibility criteria for participants. Of note was the specific nature of eligibility criteria which is seen less frequently in the wider evidence. For example, ethnicity determined by place of birth (first generation Bangladeshi) or heritage (South Asian). This is worth considering alongside the differences in intervention effectiveness between ethnic groups or generation of immigration in two studies in this review [45,58]. Moore and colleagues reported a better response in African Caribbean participants, which is logical considering that the cooking intervention utilised specific African Caribbean recipes so may have been less relevant to those from other cultural backgrounds [58]. However, it is curious that Griffiths and colleagues' report the best results in 1<sup>st</sup> generation South Asian immigrants in the intervention group, followed by the same population in the control group and a poorer response in higher generation immigrants in the intervention group [45]. Unfortunately, the study does not explore why the authors think this response was seen and therefore future studies may benefit from further exploring intervention responses between generations of migrants.

Culturally tailoring or adapting services has shown promise when applied to specific ethnically underrepresented communities and could be applied for example in service evaluation projects.. Whilst this review has highlighted key strategies for supporting ethnically underrepresented communities, only one third of studies have assessed the effectiveness of their interventions, limiting the impact of any conclusions drawn from these studies.

## Policy recommendations

This review has highlighted several areas for policymakers to consider in improving access to and engagement with health services for ethnically underrepresented communities. Central to this is the need to recognise and address power imbalances, as policies that overlook structural inequities risk reinforcing the very systems of exclusion they aim to dismantle. Making power visible – by engaging underrepresented communities in decision making processes, supporting the devolution of power, and applying structural analysis – can help transform the conditions that perpetuate unequal access. Aligned with this, trust emerged as a key theme across several studies in this review [33,34,47], underscoring the importance of working collaboratively with underrepresented communities through establishing community links. Building trust and tailoring policies to the cultural context of underrepresented communities is essential as culturally adapted approaches have been highlighted in this review as a promising way of supporting ethnically underrepresented communities. As this review focused on literature and interventions specifically within the UK, policy recommendations are also focused on the UK setting. However, there may be elements that may be relevant to other high-income countries with public health systems. For example, these recommendations align with existing work within Canada and Australia, partnering with Indigenous communities to share power in developing research and policy priorities [86,87].

## Future research

Future complex interventions in ethnically underrepresented communities should endeavour to assess the effectiveness of their work to provide conclusive results of strategies with ethnically underrepresented communities. Most of the studies in this scoping review were in mental health or primary care and therefore studies in other health services are needed. This is especially important for health services that may have specific cultural barriers, such as physiotherapy which requires enhanced engagement for success. Addressing the intricate challenges in healthcare access may necessitate multifaceted interventions covering all five domains of the patient-centred access framework. Particularly, future efforts should focus on enhancing affordability and appropriateness, identified as the least addressed components in this scoping review. Further, identified studies explored service-based interventions; it may be important for future studies to consider patients' abilities to: perceive, seek, reach, pay and engage [14].

UK based interventions may also benefit from methods used in non-UK studies, such as care-coordinators and streamlining services. Future clinical research may support this approach due to the higher prevalence of early multimorbidity in ethnically underrepresented communities, and therefore the likelihood of those communities' increased needs for multiple services.

Future research could make more efforts to increase visibility of power. This could be achieved by using positionality/reflexivity statements in outputs, adopting anti-racism approaches/interventions [88] and incorporating frameworks for structural analysis such as intersectionality [89] or critical race theory. Centring underrepresented voices through engaging with and compensating underrepresented communities for their contributions are other possible strategies. Other strategies include using participatory methodologies and developing opportunities for underrepresented communities to take positions of power within projects, for example as co-researchers [90]. Another approach is providing contextualised data by reporting on language, ethnicity and other intersecting factors. Ensuring that studies explore experiences and not just lack of engagement will provide further context to help understand the complexity and nuance of the challenges faced by underserved groups. Providing fair compensation for community contribution and redistributing power through providing opportunities for communities and underrepresented groups to take positions of power within projects.

## Limitations

Whilst this scoping review attempted to mitigate limitations by providing a clear and transparent audit process of the search strategy and analysis, some limitations remain. Whilst six electronic databases, reference lists and citations were searched, grey literature sources were not searched due to resources. The six databases chosen for this search were

selected due to their strong coverage of interdisciplinary areas and to be inclusive of psychology literature which is a known area with relevant research to this topic. Following searches, reference lists were reviewed alongside citation tracking for further identification of relevant literature. However, it is acknowledged as a limitation that other relevant evidence indexed in other non-overlapping databases such as PubMed may not have been included. Searches were limited to the years 2014–2024. This is in line with the timings of the previous NHS long-term plan, “NHS Five year Forward View” [91], and with UK worsening inequalities in the last 10 years [92]. The time limit also aligns with UK population distribution changes and an increase in ethnically underrepresented communities between the 2011 and 2021 UK census [93]. However, it may have led to an underestimation of the relevant evidence.

This scoping review focused on ethnically underrepresented communities. However, it is recognised that factors such as socioeconomic status or religious beliefs, can also impact access and engagement directly or in intersection with ethnicity. Ethnic origin was selected for its common usage in healthcare access literature [8,10] and enhanced accessibility in UK electronic health records compared to other factors [93]. This review used the term “ethnically underrepresented communities” to acknowledge the structural inequalities in representation and access, with the aim to be a more inclusive and context-sensitive term than “ethnic minority”, which may imply inferiority and overlook systematic exclusion. While the growing use of the term “global majority” as a powerful reframing is recognised, it is not yet widely adopted in academic literature and “ethnically underrepresented communities” better reflects both the focus of this study and the realities of marginalisation within specific institutional and geographical contexts.

Only 10% of the themes were independently charted and cross checked by two researchers in the team, which can lead to subjectivity [78]. This is particularly relevant for components, such as the use of multilingual facilitators which were classified as appropriateness but arguably could be classified as availability or acceptability. The PROGRESS-Plus framework, endorsed by Cochrane whilst providing a lens to analyse the inclusivity of research studies, has also received some criticism for disregarding complexity and failing to incorporate intersectionality [94].

## Conclusion

Equitable healthcare access and engagement for ethnically underrepresented communities is a paramount goal of UK health services and public health. Despite existing research, only 35 studies met the inclusion criteria of this scoping review. These identified studies successfully implemented complex interventions to support equitable healthcare, especially in primary care and mental health. This review has shown that complex interventions may support tackling the social injustice of healthcare disparities and should consider all five domains of the patient-centred access framework. Future research should also extend scope beyond primary care and mental health services.

## Supporting information

### S1 Appendix. Keywords using PCC framework.

(DOCX)

### S2 Appendix. Themes and codes.

(DOCX)

### S3 Appendix. PROGRESS-Plus analysis.

(DOCX)

### S4 Appendix. Categorisation of themes.

(DOCX)

### S5 Appendix. PRISMA-Scr checklist.

(DOCX)

## Acknowledgments

Evidence search strategy support: Equity in physiotherapy. Hayley Clark & Assad Lahlou. London, UK: Barts Health Knowledge and Library Services

## Author contributions

**Conceptualization:** Jessica Rose Pawson, Gillian Woolhead.

**Data curation:** Simon Cannon, Saira Nazeer, Caroline Phillpott, Tadala Kolawole, Joanna Fletcher.

**Formal analysis:** Jessica Rose Pawson, Gillian Woolhead.

**Investigation:** Jessica Rose Pawson, Joanna Fletcher.

**Methodology:** Jessica Rose Pawson, Gillian Woolhead.

**Project administration:** Jessica Rose Pawson, Simon Cannon, Saira Nazeer.

**Supervision:** Alison Thomson, Jamie Ross, Katie Jane Sheehan, Gillian Woolhead.

**Validation:** Saira Nazeer.

**Writing – original draft:** Jessica Rose Pawson, Gillian Woolhead.

**Writing – review & editing:** Jessica Rose Pawson, Simon Cannon, Saira Nazeer, Caroline Phillpott, Tadala Kolawole, Joanna Fletcher, Alison Thomson, Jamie Ross, Katie Jane Sheehan, Gillian Woolhead.

## References

1. Kings Fund T. What are health inequalities. 2022. [cited 2023 November 13]. <https://www.kingsfund.org.uk/publications/what-are-health-inequalities#access>
2. The Kings Fund. The health of people from ethnic minority groups in England. 2023. <https://www.kingsfund.org.uk/publications/health-people-ethnic-minority-groups-england>
3. Nussbaum C, Massou E, Fisher R, Morciano M, Harmer R, Ford J. Inequalities in the distribution of the general practice workforce in England: a practice-level longitudinal analysis. *BJGP Open*. 2021;5(5):BJGPO.2021.0066. <https://doi.org/10.3399/BJGPO.2021.0066> PMID: [34404634](https://pubmed.ncbi.nlm.nih.gov/34404634/)
4. Public Health England. Place-based approaches for reducing health inequalities: annexes. 2019. <https://www.gov.uk/government/publications/health-inequalities-place-based-approaches-to-reduce-inequalities/place-based-approaches-for-reducing-health-inequalities-annexes>
5. Knight M, Kurinczuk JJ, Spark P, Brocklehurst P. Inequalities in maternal health: national cohort study of ethnic variation in severe maternal morbidity. *BMJ*. 2009;338:b542.
6. Lawrence V, McCombie C, Nikolakopoulos G, Morgan C. Ethnicity and power in the mental health system: experiences of white British and black Caribbean people with psychosis. *Epidemiol Psychiatr Sci*. 2021;30:e12.
7. Patel K, Cardno A, Isherwood T. ' Like I said about culture. You don't talk about mental health ': An interpretative phenomenological analysis of the experience of first-episode psychosis in South Asian individuals. *Early Interv Psychiatry*. 2023;17(8):771–83. <https://doi.org/10.1111/eip.13368> PMID: [36639135](https://pubmed.ncbi.nlm.nih.gov/36639135/)
8. Dixon KC, Ferris R, Kuhn I, Spathis A, Barclay S. Gypsy, Traveller and Roma experiences, views and needs in palliative and end of life care: a systematic literature review and narrative synthesis. *BMJ Support Palliat Care*. 2021.
9. O'Regan P, Walshe N, Jordaan G, Landers M, Condon C. Inequality in Health Care and the Experiences of Women From the Irish Traveller Community. *Nurs Womens Health*. 2023;27(5):362–71. <https://doi.org/10.1016/j.nwh.2023.03.004> PMID: [37562461](https://pubmed.ncbi.nlm.nih.gov/37562461/)
10. Mayland CR, Powell RA, Clarke GC, Ebenso B, Allsop MJ. Bereavement care for ethnic minority communities: A systematic review of access to, models of, outcomes from, and satisfaction with, service provision. *PLoS One*. 2021;16(6):e0252188. <https://doi.org/10.1371/journal.pone.0252188> PMID: [34191804](https://pubmed.ncbi.nlm.nih.gov/34191804/)
11. Chauhan A, Walton M, Manias E, Walpola RL, Seale H, Latanik M, et al. The safety of health care for ethnic minority patients: a systematic review. *Int J Equity Health*. 2020;19(1):118. <https://doi.org/10.1186/s12939-020-01223-2> PMID: [32641040](https://pubmed.ncbi.nlm.nih.gov/32641040/)
12. Khanassov V, Pluye P, Descoteaux S, Haggerty JL, Russell G, Gunn J, et al. Organizational interventions improving access to community-based primary health care for vulnerable populations: a scoping review. *Int J Equity Health*. 2016;15(1):168. <https://doi.org/10.1186/s12939-016-0459-9> PMID: [27724952](https://pubmed.ncbi.nlm.nih.gov/27724952/)
13. Şekercan A, Harting J, Peters RJG, Stronks K. Understanding transnational healthcare use in immigrant communities from a cultural systems perspective: a qualitative study of Dutch residents with a Turkish background. *BMJ Open*. 2021;11(9):e051903. <https://doi.org/10.1136/bmjopen-2021-051903> PMID: [34593502](https://pubmed.ncbi.nlm.nih.gov/34593502/)

14. Levesque J-F, Harris MF, Russell G. Patient-centred access to health care: conceptualising access at the interface of health systems and populations. *Int J Equity Health*. 2013;12:18. <https://doi.org/10.1186/1475-9276-12-18> PMID: 23496984
15. O'Neill J, Tabish H, Welch V, Petticrew M, Pottie K, Clarke M, et al. Applying an equity lens to interventions: using PROGRESS ensures consideration of socially stratifying factors to illuminate inequities in health. *J Clin Epidemiol*. 2014;67(1):56–64. <https://doi.org/10.1016/j.jclinepi.2013.08.005> PMID: 24189091
16. Tricco AC, Lillie E, Zarin W, O'Brien KK, Colquhoun H, Levac D. PRISMA Extension for Scoping Reviews (PRISMA-ScR): Checklist and Explanation. *Ann Intern Med*. 2018;169(7):467–73.
17. Skivington K, Matthews L, Simpson SA, Craig P, Baird J, Blazeby JM, et al. A new framework for developing and evaluating complex interventions: update of Medical Research Council guidance. *BMJ*. 2021;374:n2061. <https://doi.org/10.1136/bmj.n2061> PMID: 34593508
18. Writing about ethnicity. 2021. <https://www.ethnicity-facts-figures.service.gov.uk/style-guide/writing-about-ethnicity>
19. Pollock D, Peters MDJ, Khalil H, McInerney P, Alexander L, Tricco AC, et al. Recommendations for the extraction, analysis, and presentation of results in scoping reviews. *JBI Evid Synth*. 2023;21(3):520–32. <https://doi.org/10.11124/JBIES-22-00123> PMID: 36081365
20. Ouzzani M, Hammady H, Fedorowicz Z, Elmagarmid A. Rayyan—a web and mobile app for systematic reviews. *Syst Rev*. 2016;5(1):210. <https://doi.org/10.1186/s13643-016-0384-4> PMID: 27919275
21. Peters MDJ, Marnie C, Tricco AC, Pollock D, Munn Z, Alexander L, et al. Updated methodological guidance for the conduct of scoping reviews. *JBI Evid Synth*. 2020;18(10):2119–26. <https://doi.org/10.11124/JBIES-20-00167> PMID: 33038124
22. Tugwell P, Petticrew M, Kristjansson E, Welch V, Ueffing E, Waters E, et al. Assessing equity in systematic reviews: realising the recommendations of the commission on social determinants of health. *BMJ*. 2010;341:c4739. <https://doi.org/10.1136/bmj.c4739> PMID: 20837575
23. Braun V, Clarke V. Using thematic analysis in psychology. *Qual Res Psychol*. 2006;3(2):77–101.
24. Braun V, Clarke V. Toward good practice in thematic analysis: avoiding common problems and becoming a knowing researcher. *Int J Transgender Health*. 2023;24(1):1–6.
25. Ough Dealy HR, Jarvis RM, Petterson M. Innovative ways of illustrating the present, imagining the future and analysing themes: A collage-elicited interview study. *Methodological Innovations*. 2021;14(3). <https://doi.org/10.1177/205979912111051452>
26. Page MJ, McKenzie JE, Bossuyt PM, Boutron I, Hoffmann TC, Mulrow CD, et al. The PRISMA 2020 statement: an updated guideline for reporting systematic reviews. *BMJ*. 2021;372:n71. <https://doi.org/10.1136/bmj.n71> PMID: 33782057
27. Stone TJ, Brangan E, Chappell A, Harrison V, Horwood J. Telephone outreach by community workers to improve uptake of NHS Health Checks in more deprived localities and minority ethnic groups: a qualitative investigation of implementation. *J Public Health (Oxf)*. 2020;42(2):e198–206. <https://doi.org/10.1093/pubmed/fdz063> PMID: 31188440
28. Buffin J, Little R, Jain N, Warrens AN. A peer outreach initiative to increase the registration of minorities as organ donors. *Clin Kidney J*. 2015;8(5):623–8. <https://doi.org/10.1093/ckj/sfv066> PMID: 26413291
29. Jain N. Increasing black, asian and minority ethnic (bame) patient & community awareness—using the peer educator model. *J Ren Care*. 2014;40(Suppl 1):36–40.
30. Edge D, Degnan A, Cotterill S, Berry K, Drake R, Baker J, et al. Culturally-adapted Family Intervention (CaFI) for African-Caribbeans diagnosed with schizophrenia and their families: a feasibility study protocol of implementation and acceptability. *Pilot Feasibility Stud*. 2016;2:39. <https://doi.org/10.1186/s40814-016-0070-2> PMID: 27965857
31. Edge D, Degnan A, Cotterill S, Berry K, Baker J, Drake R, et al. Culturally adapted Family Intervention (CaFI) for African-Caribbean people diagnosed with schizophrenia and their families: a mixed-methods feasibility study of development, implementation and acceptability. Southampton (UK): NIHR Journals Library; 2018. <https://doi.org/10.3310/hsdr06320>
32. Such E, Salway S, Copeland R, Haake S, Domone S, Mann S. A formative review of physical activity interventions for minority ethnic populations in England. *J Public Health Oxf Engl*. 2017;39(4):e265–74.
33. Goff LM, Rivas C, Moore A, Beckley-Hoelscher N, Reid F, Harding S. Healthy Eating and Active Lifestyles for Diabetes (HEAL-D), a culturally tailored self-management education and support program for type 2 diabetes in black-British adults: a randomized controlled feasibility trial. *BMJ Open Diabetes Res Care*. 2021;9(1):e002438. <https://doi.org/10.1136/bmjdr-2021-002438> PMID: 34518159
34. Dyson L, Bedford H, Condon L, Emslie C, Ireland L, Mytton J, et al. Identifying interventions with Gypsies, Roma and Travellers to promote immunisation uptake: methodological approach and findings. *BMC Public Health*. 2020;20(1):1574. <https://doi.org/10.1186/s12889-020-09614-4> PMID: 33081730
35. Penn L, Dombrowski SU, Sniehotta FF, White M. Perspectives of UK Pakistani women on their behaviour change to prevent type 2 diabetes: qualitative study using the theory domain framework. *BMJ Open*. 2014;4(7):e004530. <https://doi.org/10.1136/bmjopen-2013-004530> PMID: 25005595
36. Latif S, Ahmed I, Amin MS, Syed I, Ahmed N. Exploring the potential impact of health promotion videos as a low cost intervention to reduce health inequalities: a pilot before and after study on Bangladeshis in inner-city London. *Lond J Prim Care*. 2016;8(4):66–71.
37. Yuan S. Evaluating an oral health education intervention in Chinese undocumented migrant mothers of infants in Northern Ireland. *Dent J*. 2019;7(1):8.
38. Khan S, Lovell K, Lunat F, Masood Y, Shah S, Tomenson B, et al. Culturally-adapted cognitive behavioural therapy based intervention for maternal depression: a mixed-methods feasibility study. *BMC Womens Health*. 2019;19(1):21. <https://doi.org/10.1186/s12905-019-0712-7> PMID: 30691431

39. Filby A, Robertson W, Afonso E. A service evaluation of a specialist migrant maternity service from the user's perspective. *British Journal of Midwifery*. 2020;28(9):652–9. <https://doi.org/10.12968/bjom.2020.28.9.652>
40. Mir G, Meer S, Cottrell D, McMillan D, House A, Kanter JW. Adapted behavioural activation for the treatment of depression in Muslims. *J Affect Disord*. 2015;180:190–9. <https://doi.org/10.1016/j.jad.2015.03.060> PMID: 25913804
41. Moore AP, Rivas CA, Stanton-Fay S, Harding S, Goff LM. Designing the Healthy Eating and Active Lifestyles for Diabetes (HEAL-D) self-management and support programme for UK African and Caribbean communities: a culturally tailored, complex intervention under-pinned by behaviour change theory. *BMC Public Health*. 2019;19(1):1146. <https://doi.org/10.1186/s12889-019-7411-z> PMID: 31429735
42. Masood Y, Lovell K, Lunat F, Atif N, Waheed W, Rahman A, et al. Group psychological intervention for postnatal depression: a nested qualitative study with British South Asian women. *BMC Womens Health*. 2015;15:109. <https://doi.org/10.1186/s12905-015-0263-5> PMID: 26603604
43. Husain N, Lunat F, Lovell K, Sharma D, Zaidi N, Bokhari A, et al. Exploratory RCT of a group psychological intervention for postnatal depression in British mothers of South Asian origin - ROSHNI-D. *Acta Psychol (Amst)*. 2023;238:103974. <https://doi.org/10.1016/j.actpsy.2023.103974> PMID: 37413896
44. Kelly C, Pericleous M, Ahmed A, Vandrevala T, Hendy J, Shafi S, et al. Improving uptake of hepatitis B and hepatitis C testing in South Asian migrants in community and faith settings using educational interventions-A prospective descriptive study. *Int J Infect Dis*. 2020;100:264–72. <https://doi.org/10.1016/j.ijid.2020.08.059> PMID: 32861830
45. Griffiths C, Bremner S, Islam K, Sohanpal R, Vidal D-L, Dawson C, et al. Effect of an Education Programme for South Asians with Asthma and Their Clinicians: A Cluster Randomised Controlled Trial (OEDIUS). *PLoS One*. 2016;11(12):e0158783. <https://doi.org/10.1371/journal.pone.0158783> PMID: 28030569
46. Bush K, Thomas R, Raymond NT, Sankar S, Barker PJ, O'Hare JP. Cluster randomised controlled trial evaluation of a Link Worker-delivered intervention to improve uptake of diabetic retinopathy screening in a South Asian population. *Diab Vasc Dis Res*. 2014;11(4):294–7. <https://doi.org/10.1177/1479164114532964> PMID: 24845073
47. Crawshaw AF, Kitoko LM, Nkembu SL, Lutumba LM, Hickey C, Deal A. Co-designing a theory-informed, multicomponent intervention to increase vaccine uptake with Congolese migrants: A qualitative, community-based participatory research study (LISOLLO MALAMU). *Health Expect Int J Public Particip Health Care Health Policy*. 2023. <https://search.ebscohost.com/login.aspx?direct=true&AuthType=sso&db=cmedm&AN=37831054&site=ehost-live&custid=ns123330>
48. Offman J, Myles J, Ariyanayagam S, Colorado Z, Sharp M, Cruice M, et al. A telephone reminder intervention to improve breast screening information and access. *Public Health*. 2014;128(11):1017–22. <https://doi.org/10.1016/j.puhe.2014.09.007> PMID: 25443131
49. Roche M, Mukadam N, Adelman S, Livingston G. The IDEMcare study-improving dementia care in black african and caribbean groups: a feasibility cluster randomised controlled trial. *Int J Geriatr Psychiatry*. 2018;33(8):1048–56. <https://doi.org/10.1002/gps.4891> PMID: 29744950
50. Parveen S, Blakey H, Oyebode JR. Evaluation of a carers' information programme culturally adapted for South Asian families. *Int J Geriatr Psychiatry*. 2018;33(2):e199–204. <https://doi.org/10.1002/gps.4768> PMID: 28766793
51. Robinson A, O'Brien N, Sile L, Guraya HK, Govind T, Harris V, et al. Recommendations for community pharmacy to improve access to medication advice for people from ethnic minority communities: A qualitative person-centred codesign study. *Health Expect*. 2022;25(6):3040–52. <https://doi.org/10.1111/hex.13611> PMID: 36161966
52. Lamb J, Dowrick C, Burroughs H, Beatty S, Edwards S, Bristow K, et al. Community Engagement in a complex intervention to improve access to primary mental health care for hard-to-reach groups. *Health Expect*. 2015;18(6):2865–79. <https://doi.org/10.1111/hex.12272> PMID: 25263536
53. Lwembe S, Green SA, Chigwende J, Ojwang T, Dennis R. Co-production as an approach to developing stakeholder partnerships to reduce mental health inequalities: an evaluation of a pilot service. *Prim Health Care Res Dev*. 2017;18(1):14–23. <https://doi.org/10.1017/S1463423616000141> PMID: 27132634
54. Mantovani N, Pizzolati M, Gillard S. Engaging communities to improve mental health in African and African Caribbean groups: a qualitative study evaluating the role of community well-being champions. *Health Soc Care Community*. 2017;25(1):167–76. <https://doi.org/10.1111/hsc.12288> PMID: 26439601
55. McEvoy P, Williamson T, Kada R, Frazer D, Dhliwayo C, Gask L. Improving access to mental health care in an Orthodox Jewish community: a critical reflection upon the accommodation of otherness. *BMC Health Serv Res*. 2017;17(1):557. <https://doi.org/10.1186/s12913-017-2509-4> PMID: 28806946
56. Owiti JA, Ajaz A, Ascoli M, de Jongh B, Palinski A, Bhui KS. Cultural consultation as a model for training multidisciplinary mental healthcare professionals in cultural competence skills: preliminary results. *J Psychiatr Ment Health Nurs*. 2014;21(9):814–26. <https://doi.org/10.1111/jpm.12124> PMID: 24279693
57. Low JTS, Lowry S, Goff LM, Irwin S, Brady O, Curran N, et al. Healthy Eating and Active Lifestyles for Diabetes (HEAL-D) Online: a mixed methods evaluation exploring the feasibility of implementing a virtual culturally tailored diabetes self-management programme for African and Caribbean communities. *BMJ Open*. 2024;14(10):e085847. <https://doi.org/10.1136/bmjopen-2024-085847> PMID: 39461868
58. Moore SG, Kundra A, Ho P, Bissell E, Apekey T. Feasibility of a community healthy eating and cooking intervention featuring traditional african caribbean foods from participant and staff perspectives. *Nutrients*. 2023;15(17):3758. <https://doi.org/10.3390/nu15173758> PMID: 37686789

59. Lowry S, Goff L, Irwin S, Brady O, Curran N, Lelliott Z, et al. Mixed-methods implementation study of a virtual culturally tailored diabetes self-management programme for African and Caribbean communities (HEAL-D) in south London and its scaling up across NHS regions in England: study protocol. *BMJ Open*. 2022;12(11):e067161. <https://doi.org/10.1136/bmjopen-2022-067161> PMID: 36351722
60. Flanagan S, Kunkel J, Appleby V, Eldridge SE, Ismail S, Moreea S, et al. Case finding and therapy for chronic viral hepatitis in primary care (HepFREE): a cluster-randomised controlled trial. *Lancet Gastroenterol Hepatol*. 2019;4(1):32–44. [https://doi.org/10.1016/S2468-1253\(18\)30318-2](https://doi.org/10.1016/S2468-1253(18)30318-2) PMID: 30477810
61. Krasuska M, Davidson EM, Beune E, Jenum AK, Gill JM, Stronks K, et al. A culturally adapted diet and physical activity text message intervention to prevent type 2 diabetes mellitus for women of pakistani origin living in scotland: formative study. *JMIR Form Res*. 2023;7:e33810. <https://doi.org/10.2196/33810> PMID: 37713245
62. Hussain NM, Spiers J, Kobab F, Riley R. The impact of race and gender-related discrimination on the psychological distress experienced by junior doctors in the UK: A qualitative secondary data analysis. *Healthc Basel Switz*. 2023;11(6).
63. Moore L, Jayaweera H, Redshaw M, Quigley M. Migration, ethnicity and mental health: evidence from mothers participating in the Millennium Cohort Study. *Public Health*. 2019;171:66–75. <https://doi.org/10.1016/j.puhe.2019.03.022> PMID: 31103615
64. Shommu NS, Ahmed S, Rumana N, Barron GRS, McBrien KA, Turin TC. What is the scope of improving immigrant and ethnic minority health-care using community navigators: A systematic scoping review. *Int J Equity Health*. 2016;15:6. <https://doi.org/10.1186/s12939-016-0298-8> PMID: 26768130
65. Eto F, Samuel M, Henkin R, Mahesh M, Ahmad T, Angdembe A, et al. Ethnic differences in early onset multimorbidity and associations with health service use, long-term prescribing, years of life lost, and mortality: A cross-sectional study using clustering in the UK Clinical Practice Research Datalink. *PLoS Med*. 2023;20(10):e1004300. <https://doi.org/10.1371/journal.pmed.1004300> PMID: 37889900
66. Kaufman A, Derksen D, McKernan S, Galbraith P, Sava S, Wills J, et al. Managed care for uninsured patients at an academic health center: a case study. *Acad Med*. 2000;75(4):323–30. <https://doi.org/10.1097/00001888-200004000-00007> PMID: 10893113
67. Place V, Nabb B, Viksten Assel K, Bäärnhielm S, Dalman C, Hollander A-C. Interventions to increase migrants' care-seeking behaviour for stigmatised conditions: a scoping review. *Soc Psychiatry Psychiatr Epidemiol*. 2021;56(6):913–30. <https://doi.org/10.1007/s00127-021-02065-1> PMID: 33778914
68. Clifford A, McCalman J, Bainbridge R, Tsey K. Interventions to improve cultural competency in health care for Indigenous peoples of Australia, New Zealand, Canada and the USA: a systematic review. *Int J Qual Health Care*. 2015;27(2):89–98. <https://doi.org/10.1093/intqhc/mzv010> PMID: 25758442
69. Nguyen NH, Subhan FB, Williams K, Chan CB. Barriers and Mitigating Strategies to Healthcare Access in Indigenous Communities of Canada: A Narrative Review. *Healthcare (Basel)*. 2020;8(2):112. <https://doi.org/10.3390/healthcare8020112> PMID: 32357396
70. Nierkens V, Hartman MA, Nicolaou M, Vissenberg C, Beune EJAJ, Hosper K, et al. Effectiveness of cultural adaptations of interventions aimed at smoking cessation, diet, and/or physical activity in ethnic minorities. a systematic review. *PLoS One*. 2013;8(10):e73373. <https://doi.org/10.1371/journal.pone.0073373> PMID: 24116000
71. Henderson S, Kendall E, See L. The effectiveness of culturally appropriate interventions to manage or prevent chronic disease in culturally and linguistically diverse communities: a systematic literature review. *Health Soc Care Community*. 2011;19(3):225–49. <https://doi.org/10.1111/j.1365-2524.2010.00972.x> PMID: 21208326
72. Kokko R. Future nurses' cultural competencies: what are their learning experiences during exchange and studies abroad? A systematic literature review. *J Nurs Manag*. 2011;19(5):673–82. <https://doi.org/10.1111/j.1365-2834.2011.01221.x> PMID: 21749541
73. Smith Jervelund S, Vinther-Jensen K, Ryom K, Villadsen SF, Hempler NF. Recommendations for ethnic equity in health: A Delphi study from Denmark. *Scand J Public Health*. 2023;51(3):339–46. <https://doi.org/10.1177/14034948211040965> PMID: 34515598
74. Czapka EA, Sagbakken M. "It is always me against the Norwegian system." barriers and facilitators in accessing and using dementia care by minority ethnic groups in Norway: a qualitative study. *BMC Health Serv Res*. 2020;20(1):954. <https://doi.org/10.1186/s12913-020-05801-6> PMID: 33059685
75. Nielsen TR, Nielsen DS, Waldemar G. Feasibility of a culturally tailored dementia information program for minority ethnic communities in Denmark. *Int J Geriatr Psychiatry*. 2022;37(1):10.1002/gps.5656. <https://doi.org/10.1002/gps.5656> PMID: 34762345
76. Gkiouleka A, Wong G, Sowden S, Bambra C, Siersbaek R, Manji S, et al. Reducing health inequalities through general practice. *Lancet Public Health*. 2023;8(6):e463–72. [https://doi.org/10.1016/S2468-2667\(23\)00093-2](https://doi.org/10.1016/S2468-2667(23)00093-2) PMID: 37244675
77. Gkiouleka A, Huijts T, Beckfield J, Bambra C. Understanding the micro and macro politics of health: Inequalities, intersectionality & institutions - A research agenda. *Soc Sci Med*. 2018;200:92–8. <https://doi.org/10.1016/j.socscimed.2018.01.025> PMID: 29421476
78. Cu A, Meister S, Lefebvre B, Ridde V. Assessing healthcare access using the Levesque's conceptual framework- a scoping review. *Int J Equity Health*. 2021;20(1):116. <https://doi.org/10.1186/s12939-021-01416-3> PMID: 33962627
79. Institute of Health Equity. Structural racism ethnicity and health inequalities. 2024. <https://www.instituteoftheequity.org/resources-reports/structural-racism-ethnicity-and-health-inequalities/executive-summary.pdf>
80. NHS Race & Health Observatory. Ethnic health inequalities and the NHS: Driving progress in a changing system. 2021. <https://nhsrho.org/wp-content/uploads/2023/05/Ethnic-Health-Inequalities-Kings-Fund-Report.pdf>
81. Race Forward. What is racial equity? 2023. <https://www.raceforward.org/what-racial-equity-0>

82. Banaji MR, Fiske ST, Massey DS. Systemic racism: individuals and interactions, institutions and society. *Cogn Res Princ Implic*. 2021;6(1):82. <https://doi.org/10.1186/s41235-021-00349-3> PMID: 34931287
83. Davy C, Harfield S, McArthur A, Munn Z, Brown A. Access to primary health care services for Indigenous peoples: A framework synthesis. *Int J Equity Health*. 2016;15(1):163. <https://doi.org/10.1186/s12939-016-0450-5> PMID: 27716235
84. Clemente KAP, Silva SVD, Vieira GI, Bortoli MCD, Toma TS, Ramos VD. Barreiras ao acesso das pessoas com deficiência aos serviços de saúde: uma revisão de escopo. *Rev Saúde Pública*. 2022;56:64.
85. Chauhan A, Leefe J, Shé ÉN, Harrison R. Optimising co-design with ethnic minority consumers. *Int J Equity Health*. 2021;20(1):240. <https://doi.org/10.1186/s12939-021-01579-z> PMID: 34736455
86. Pratt B. Sharing power in global health research: an ethical toolkit for designing priority-setting processes that meaningfully include communities. *Int J Equity Health*. 2021;20(1):127. <https://doi.org/10.1186/s12939-021-01453-y> PMID: 34034747
87. Candian Institutes of Health Research. Sharing Knowledge - Moving Forward. 2015. <https://cihr-irsc.gc.ca/e/49749.html>
88. Hassen N, Lofters A, Michael S, Mall A, Pinto AD, Rackal J. Implementing Anti-Racism Interventions in Healthcare Settings: A Scoping Review. *Int J Environ Res Public Health*. 2021;18(6):2993. <https://doi.org/10.3390/ijerph18062993> PMID: 33803942
89. Macgregor C, Walumbe J, Tulle E, Seenan C, Blane DN. Intersectionality as a theoretical framework for researching health inequities in chronic pain. *Br J Pain*. 2023;17(5):479–90. <https://doi.org/10.1177/20494637231188583> PMID: 38107758
90. Kia-Keating M, Juang LP. Participatory science as a decolonizing methodology: Leveraging collective knowledge from partnerships with refugee and immigrant communities. *Cultur Divers Ethnic Minor Psychol*. 2022;28(3):299–305. <https://doi.org/10.1037/cdp0000514> PMID: 35007114
91. NHS England. NHS Five Year Forward View. 2014. <https://www.england.nhs.uk/publication/nhs-five-year-forward-view>
92. Marmot M. Health equity in England: the Marmot review 10 years on. *BMJ*. 2020:m693.
93. Office for National Statistics. Ethnic Group, England and Wales. 2022. <https://www.ons.gov.uk/peoplepopulationandcommunity/culturalidentity/ethnicity/bulletins/ethnicgroupenglandandwales/census2021>
94. McCann L, Johnson L, Gkiouleka A, Pearce H, Ford J. Closing the gap: introducing the EQUALS MAP framework for equity-focused evidence synthesis. *Eur J Public Health*. 2024;34(Supplement\_3):ckae144.1246.
